# Supplementary material for: Energetic coordination compounds: self-assembled from the nitrogen-rich energetic C–C bonded pyrazoles and triazoles
Source: Royal Society of Chemistry journal article supplement (doi:10.1039/d3dt02410e), 2023-01-01
Supplement: d3dt02410e1.pdf [file d3dt02410e1.pdf]

## Supporting Information

### **Energetic coordination compounds: self-assembled from the nitrogen-rich energetic C-C bonded pyrazole and triazole**

Abhishek Kumar Yadav,<sup>a‡</sup> Richa Rajak,<sup>a‡</sup> Vikas D. Ghule,<sup>b</sup> Srinivas Dharavath<sup>a\*</sup>

<sup>a</sup>Energetic Materials Laboratory, Department of Chemistry, Indian Institute of Technology Kanpur, Kanpur-208016, Uttar Pradesh, India. [orcid.org/ 0000-0003-0511-0607](https://orcid.org/0000-0003-0511-0607). E-mail: [srinivasd@iitk.ac.in](mailto:srinivasd@iitk.ac.in)

<sup>b</sup>Department of Chemistry, National Institute of Technology Kurukshetra, Kurukshetra-136119, Haryana, India. [orcid.org/0000-0002-0967-7777](https://orcid.org/0000-0002-0967-7777).

<sup>‡</sup> Authors contributed equally

| <b>Table of Contents</b>                                  | <b>Page No.</b> |
|-----------------------------------------------------------|-----------------|
| General Methods and synthesis of compounds                | <b>S2-S5</b>    |
| <b>Figure S1.</b> PXRD spectra of compounds <b>1–6</b> .  | <b>S5</b>       |
| Crystal Structure analysis of compounds <b>1–6</b> .      | <b>S6-S22</b>   |
| <b>Figure S10.</b> IR spectrum of compound <b>1</b> .     | <b>S23</b>      |
| <b>Figure S11.</b> TGA-DSC curves for compound <b>1</b> . | <b>S23</b>      |
| <b>Figure S12.</b> IR spectrum of compound <b>2</b> .     | <b>S24</b>      |
| <b>Figure S13.</b> TGA-DSC curves for compound <b>2</b> . | <b>S24</b>      |
| <b>Figure S14.</b> IR spectrum of compound <b>3</b> .     | <b>S25</b>      |
| <b>Figure S15.</b> TGA-DSC curves for compound <b>3</b> . | <b>S25</b>      |
| <b>Figure S16.</b> IR spectrum of compound <b>4</b> .     | <b>S26</b>      |
| <b>Figure S17.</b> TGA-DSC curves for compound <b>4</b> . | <b>S26</b>      |
| <b>Figure S18.</b> IR spectrum of compound <b>5</b> .     | <b>S27</b>      |
| <b>Figure S19.</b> TGA-DSC curves for compound <b>5</b> . | <b>S27</b>      |
| <b>Figure S20.</b> IR spectrum of compound <b>6</b> .     | <b>S28</b>      |
| <b>Figure S21.</b> TGA-DSC curves for compound <b>6</b> . | <b>S28</b>      |
| Heat of combustion                                        | <b>S28-S29</b>  |
| References                                                | <b>S30</b>      |

## Experimental Section

**Caution!** All the compounds investigated are potentially explosive, energetic materials. Although we have experienced no difficulties in the syntheses and characterization of these compounds, manipulations must be carried out by using appropriate standard safety precautions. Eye protection and leather gloves must be always worn.

### Materials and Methods:

Reagents were purchased from Ak Scientifics, Acros Organics or Aldrich as analytical grade and were used as received. Melting and Decomposition temperatures (onset) were recorded using a dry nitrogen gas purge and at heating rate of  $10\text{ }^{\circ}\text{C min}^{-1}$  on a differential scanning calorimeter (SDT650). IR spectra were recorded using Zn-Se pellets with ECO-ATR spectrometer (Bruker Alpha II). The powder X-ray diffraction (PXRD) data measurements were collected using a Rigaku MiniFlex 600 diffractometer. Density was determined at room temperature by employing Anton Par Ultra5000 gas pycnometer. Impact and friction-sensitivity measurements were tested by employing a standard BAM Fall hammer and a BAM friction tester. The single-crystal X-ray data collection was carried out using Bruker APEX-II CCD diffractometer. The crystal was kept at 100 K during data collection. Using Olex2<sup>1</sup>, the structure was solved with the olex2.solve<sup>2</sup> structure solution program using Charge Flipping and refined with the SHELXL<sup>3</sup> refinement package using Least Squares minimisation. The non-covalent interactions and molecular drawings were studied using the Diamond program.<sup>4</sup> The surface morphology of compounds **1–6** was examined using Scanning electron microscopy (SEM) (CARL ZEISS EVO 50). Samples were prepared by coating with a thin gold layer in a vacuum prior to examination.

**Synthesis of 1:** A solution of  $\text{Ni}(\text{NO}_3)_2 \cdot 6\text{H}_2\text{O}$  (58 mg, 0.2 mmol) was taken in 5 mL of methanol and added dropwise to a mixed stirred solution (1:1,  $\text{H}_2\text{O}:\text{MeOH}$ ) of NPTA (39 mg, 0.2 mmol) at room temperature. Immediate precipitate was observed. The mixture was stirred for further 2 hrs at same temperature, formed solid precipitate was filtered and washed 2–3 times with DI water, methanol and air-dried to obtain the powder samples. The filtrate was slowly evaporated at room temperature and green block-shaped single crystals of **1** were grown in 5 days to obtain the crystal product. Yield: 70%.  $T_d$  (onset):  $316\text{ }^{\circ}\text{C}$ . IR (ATR ZnSe): 3459, 3352, 3237, 3149, 1644, 1482, 1399, 1325, 1275, 1187, 1118, 1043, 1022, 986, 914, 868, 825,  $747\text{ cm}^{-1}$ .

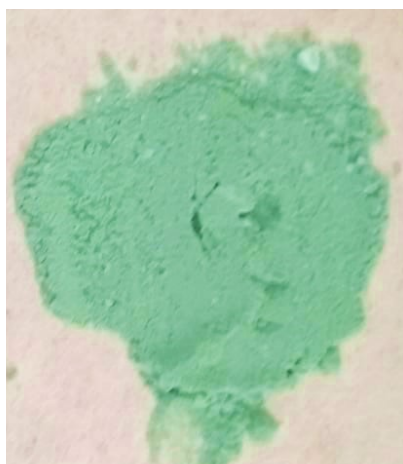

**Synthesis of 2:** Complex **2** was synthesized by the method described as **1** using  $\text{Co}(\text{NO}_3)_2 \cdot 6\text{H}_2\text{O}$  (58 mg, 0.2 mmol) instead of  $\text{Ni}(\text{NO}_3)_2 \cdot 6\text{H}_2\text{O}$ . Dark pink block-shaped single crystals of **2** were grown in 7 days by slow evaporation of filtrate at room temperature. Yield: 66%.  $T_d$  (onset): 331 °C. IR (ATR ZnSe): 3470, 3263, 2986, 2886, 2819, 2352, 1770, 1709, 1596, 1487, 1391, 1334, 1278, 1181, 1123, 967, 924, 834, 752  $\text{cm}^{-1}$ .

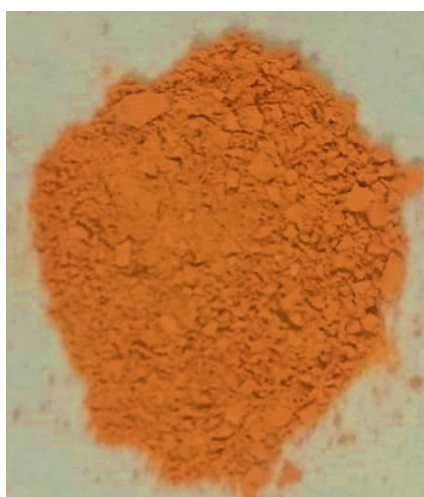

**Synthesis of 3:** Complex **3** was obtained using the same method as **1**.  $\text{Zn}(\text{NO}_3)_2 \cdot 6\text{H}_2\text{O}$  (60 mg, 0.2 mmol) instead of  $\text{Ni}(\text{NO}_3)_2 \cdot 6\text{H}_2\text{O}$ . Colourless block-shaped single crystals of **3** were obtained in 7 days by slow evaporation of filtrate at room temperature. Yield: 76%.  $T_d$  (onset): 351 °C. IR (ATR ZnSe): 3496, 3263, 2989, 2886, 2819, 2352, 1779, 1712, 1632, 1594, 1480, 1382, 1290, 1123, 1084, 975, 929, 830, 752  $\text{cm}^{-1}$ .

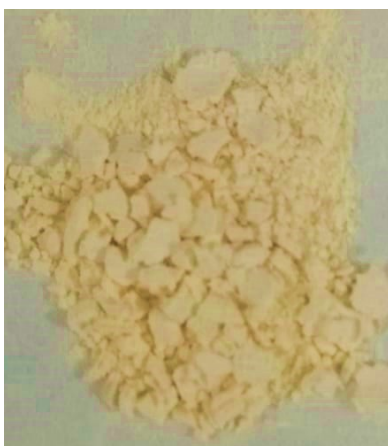

**Synthesis of 4:** 10 mL aqueous solution of  $\text{Ni}(\text{NO}_3)_2 \cdot 6\text{H}_2\text{O}$  (58 g, 0.2 mmol) was added to the 10 mL mixed solvent solution of NPTN (48 mg, 0.2 mmol) in water and methanol (1:1) and stirred the reaction mixture for 6 hrs at room temperature and observed the light green coloured precipitate. The formed precipitate was filtered off, washed with water, methanol and air-dried. The powder compound was dissolved in DMF and kept for crystallization at room temperature. Light green coloured block-shaped single crystals of **4** were obtained in 15 days by slow evaporation of the solvent. Yield: 66%.  $T_d$  (onset): 375 °C. IR (ATR ZnSe): 3360, 3303, 3145, 1648, 1602, 1532, 1469, 1415, 1358, 1305, 1255, 1206, 1145, 1102, 1026, 985, 942, 835, 746  $\text{cm}^{-1}$ .

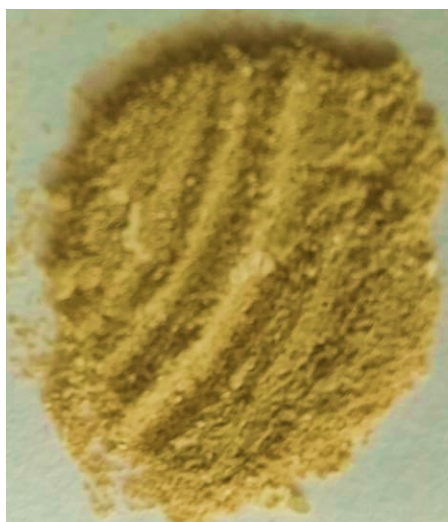

**Synthesis of 5:** Complex **5** was obtained using the same method as **4**.  $\text{Co}(\text{NO}_3)_2 \cdot 6\text{H}_2\text{O}$  (58 mg, 0.2 mmol) was used instead of  $\text{Ni}(\text{NO}_3)_2 \cdot 6\text{H}_2\text{O}$ . Pink-coloured block-shaped crystals of **5** were gained in 15 days by slow evaporation of solution at room temperature. Yield: 64%.  $T_d$  (onset): 216 °C. IR (ATR ZnSe): 3317, 3271, 3127, 1738, 1524, 1465, 1354, 1308, 1248, 1197, 1142, 1097, 1062, 973, 959, 934, 828, 739  $\text{cm}^{-1}$ .

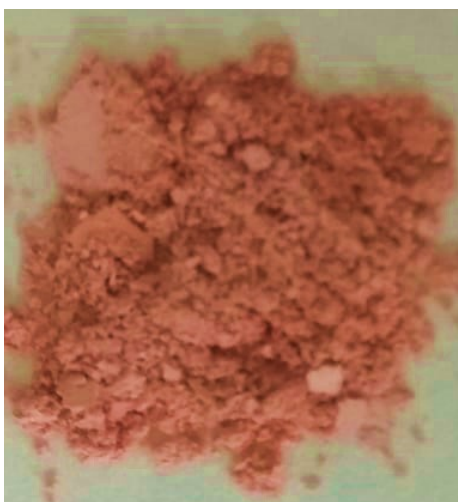

**Synthesis of 6:** Complex **6** was obtained using the same method used for **4**.  $\text{Zn}(\text{NO}_3)_2 \cdot 6\text{H}_2\text{O}$  (60 mg, 0.2 mmol) was used instead of  $\text{Ni}(\text{NO}_3)_2 \cdot 6\text{H}_2\text{O}$ . Light, yellow-coloured block-shaped crystals of **6** were obtained in 10 days by slow evaporation of solution at room temperature. Yield: 70%.  $T_d$  (onset): 333 °C. IR (ATR ZnSe): 3378, 3158, 3114, 2961, 1752, 1613, 1523, 1459, 1343, 1200, 1111, 1011, 946, 844, 802, 737  $\text{cm}^{-1}$ .

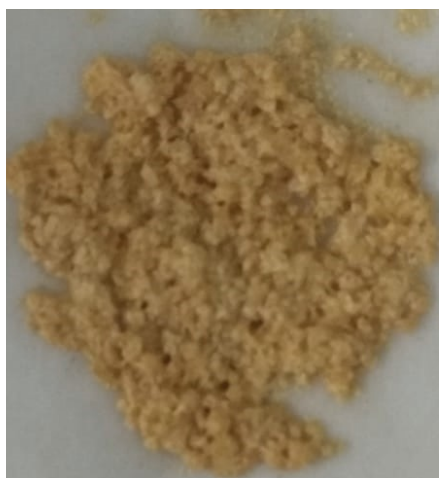

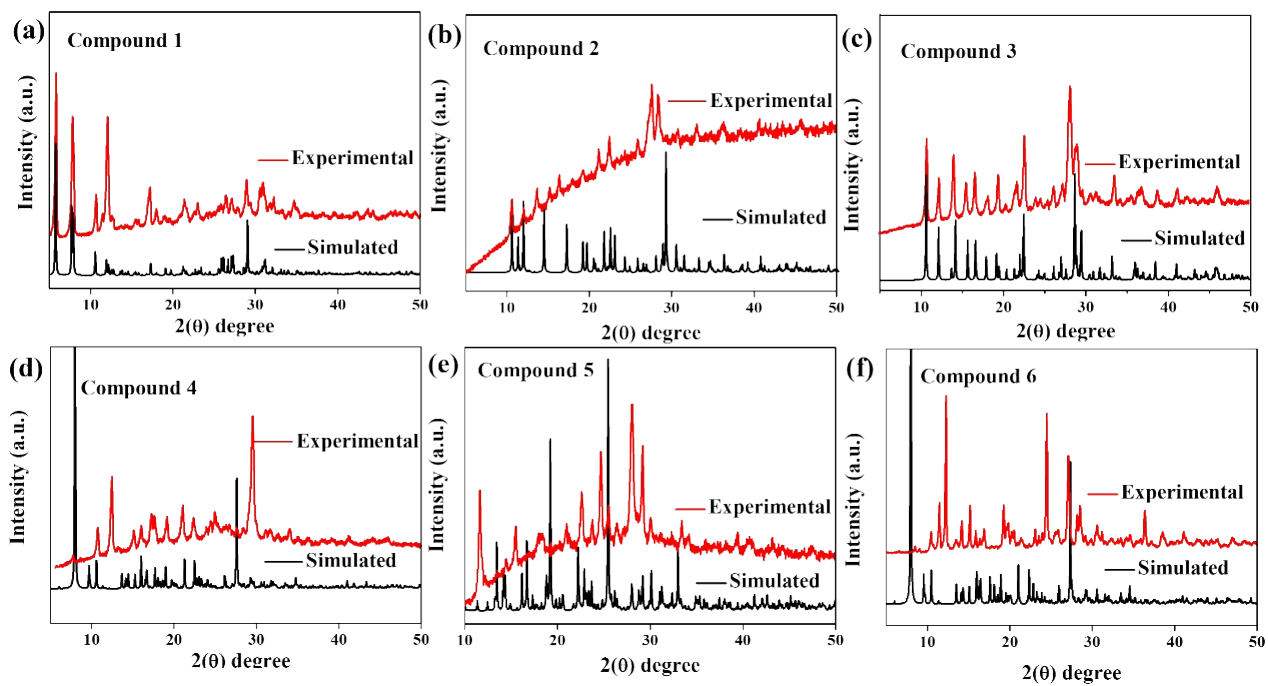

Figure S1. PXRD spectra of compounds 1–6.

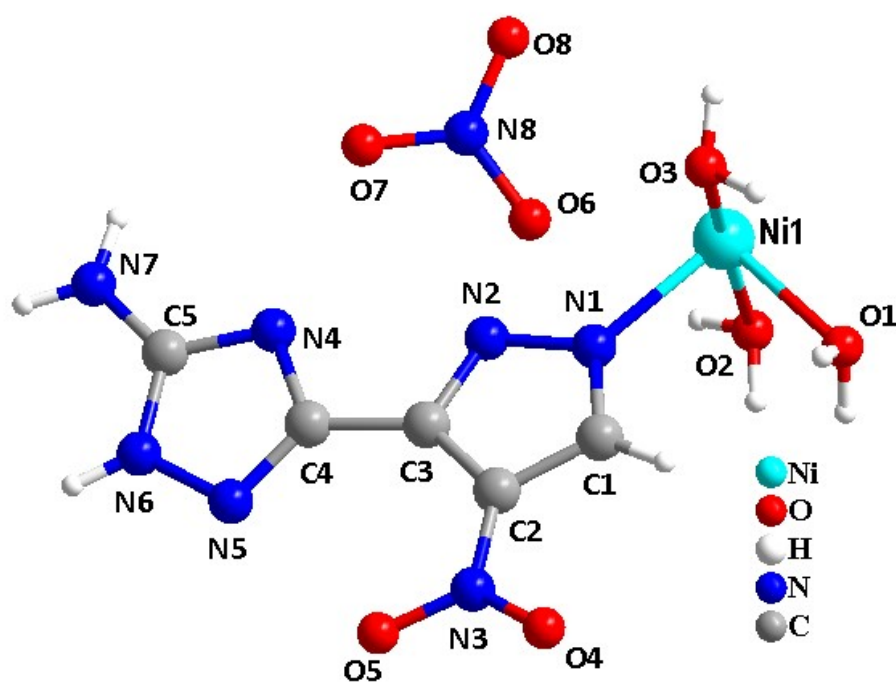

Figure S2. The asymmetric unit of compound 1.

Table S1. Crystal data and structure refinement for 1.

|                                                              |                                                                                 |
|--------------------------------------------------------------|---------------------------------------------------------------------------------|
| CCDC No.                                                     | 2258463                                                                         |
| Identification code                                          | 1                                                                               |
| Empirical formula                                            | C <sub>10</sub> H <sub>20</sub> N <sub>16</sub> Ni <sub>2</sub> O <sub>16</sub> |
| Formula weight                                               | 737.84                                                                          |
| Temperature/K                                                | 100                                                                             |
| Crystal system                                               | monoclinic                                                                      |
| Space group                                                  | <i>P</i> 2 <sub>1</sub> / <i>n</i>                                              |
| <i>a</i> /Å                                                  | 9.215(2)                                                                        |
| <i>b</i> /Å                                                  | 10.564(2)                                                                       |
| <i>c</i> /Å                                                  | 13.351(3)                                                                       |
| $\alpha$ /°                                                  | 90                                                                              |
| $\beta$ /°                                                   | 109.349(7)                                                                      |
| $\gamma$ /°                                                  | 90                                                                              |
| Volume/Å <sup>3</sup>                                        | 1226.3(5)                                                                       |
| <i>Z</i>                                                     | 2                                                                               |
| $\rho_{\text{calc}}$ /cm <sup>3</sup>                        | 1.998                                                                           |
| $\mu$ /mm <sup>-1</sup>                                      | 1.647                                                                           |
| <i>F</i> (000)                                               | 752.0                                                                           |
| Crystal size/mm <sup>3</sup>                                 | 0.22 × 0.2 × 0.16                                                               |
| Radiation                                                    | MoK $\alpha$ ( $\lambda$ = 0.71073)                                             |
| 2 $\Theta$ range for data collection/°                       | 5.032 to 56.694                                                                 |
| Index ranges                                                 | -12 ≤ <i>h</i> ≤ 12, -14 ≤ <i>k</i> ≤ 14, -17 ≤ <i>l</i> ≤ 17                   |
| Reflections collected                                        | 17031                                                                           |
| Independent reflections                                      | 3003 [ <i>R</i> <sub>int</sub> = 0.0874, <i>R</i> <sub>sigma</sub> = 0.0612]    |
| Data/restraints/parameters                                   | 3003/1/200                                                                      |
| Goodness-of-fit on <i>F</i> <sup>2</sup>                     | 1.185                                                                           |
| Final <i>R</i> indexes [ <i>I</i> ≥ 2 $\sigma$ ( <i>I</i> )] | <i>R</i> <sub>1</sub> = 0.0995, <i>wR</i> <sub>2</sub> = 0.2754                 |
| Final <i>R</i> indexes [all data]                            | <i>R</i> <sub>1</sub> = 0.1080, <i>wR</i> <sub>2</sub> = 0.2830                 |
| Largest diff. peak/hole / e Å <sup>-3</sup>                  | 3.61/-1.26                                                                      |

**Table S2. Bond Lengths for 1.**

| Atom | Atom            | Length/Å | Atom | Atom | Length/Å |
|------|-----------------|----------|------|------|----------|
| Ni1  | O1              | 2.151(4) | O8   | N8   | 1.258(8) |
| Ni1  | O3              | 2.065(5) | N4   | C5   | 1.345(8) |
| Ni1  | N1              | 2.054(6) | N4   | C4   | 1.370(8) |
| Ni1  | O2              | 2.098(5) | N2   | C3   | 1.342(8) |
| Ni1  | N4 <sup>1</sup> | 2.066(5) | N3   | C2   | 1.403(8) |
| Ni1  | N2 <sup>1</sup> | 2.079(5) | N6   | N5   | 1.374(8) |
| O7   | N8              | 1.245(8) | N6   | C5   | 1.339(9) |
| N1   | N2              | 1.377(7) | C1   | C2   | 1.383(9) |
| N1   | C1              | 1.338(8) | N5   | C4   | 1.315(8) |
| O6   | N8              | 1.281(8) | N7   | C5   | 1.346(9) |

**Table S2. Bond Lengths for 1.**

| Atom | Atom | Length/Å | Atom | Atom | Length/Å |
|------|------|----------|------|------|----------|
| O5   | N3   | 1.250(7) | C3   | C4   | 1.471(8) |
| O4   | N3   | 1.230(8) | C3   | C2   | 1.405(8) |

<sup>1</sup>1-X,1-Y,1-Z**Table S3. Bond Angles for 1.**

| Atom            | Atom | Atom             | Angle/°   | Atom | Atom | Atom | Angle/°  |
|-----------------|------|------------------|-----------|------|------|------|----------|
| O3              | Ni1  | O1               | 84.27(18) | C3   | N2   | N1   | 108.5(5) |
| O3              | Ni1  | O2               | 172.6(2)  | O5   | N3   | C2   | 118.0(6) |
| O3              | Ni1  | N4 <sup>1</sup>  | 90.1(2)   | O4   | N3   | O5   | 123.0(6) |
| O3              | Ni1  | N2 <sup>1</sup>  | 96.5(2)   | O4   | N3   | C2   | 119.0(6) |
| N1              | Ni1  | O1               | 91.17(19) | C5   | N6   | N5   | 110.6(5) |
| N1              | Ni1  | O3               | 88.9(2)   | O7   | N8   | O6   | 119.6(6) |
| N1              | Ni1  | O2               | 88.9(2)   | O7   | N8   | O8   | 120.9(6) |
| N1              | Ni1  | N4 <sup>1</sup>  | 177.5(2)  | O8   | N8   | O6   | 119.4(6) |
| N1              | Ni1  | N2 <sup>1</sup>  | 99.6(2)   | N1   | C1   | C2   | 109.9(6) |
| O2              | Ni1  | O1               | 88.72(18) | C4   | N5   | N6   | 102.2(5) |
| N4 <sup>1</sup> | Ni1  | O1               | 91.00(19) | N2   | C3   | C4   | 114.3(5) |
| N4 <sup>1</sup> | Ni1  | O2               | 92.4(2)   | N2   | C3   | C2   | 108.6(5) |
| N4 <sup>1</sup> | Ni1  | N2 <sup>1</sup>  | 78.2(2)   | C2   | C3   | C4   | 137.1(6) |
| N2 <sup>1</sup> | Ni1  | O1               | 169.2(2)  | N4   | C5   | N7   | 125.6(6) |
| N2 <sup>1</sup> | Ni1  | O2               | 90.8(2)   | N6   | C5   | N4   | 109.1(5) |
| N2              | N1   | Ni1              | 125.3(4)  | N6   | C5   | N7   | 125.3(6) |
| C1              | N1   | Ni1              | 126.8(4)  | N4   | C4   | C3   | 115.4(5) |
| C1              | N1   | N2               | 107.9(5)  | N5   | C4   | N4   | 115.0(6) |
| C5              | N4   | Ni1 <sup>1</sup> | 141.2(4)  | N5   | C4   | C3   | 129.6(6) |
| C5              | N4   | C4               | 103.0(5)  | N3   | C2   | C3   | 129.7(6) |
| C4              | N4   | Ni1 <sup>1</sup> | 115.2(4)  | C1   | C2   | N3   | 125.1(6) |
| N1              | N2   | Ni1 <sup>1</sup> | 134.5(4)  | C1   | C2   | C3   | 105.1(5) |
| C3              | N2   | Ni1 <sup>1</sup> | 116.5(4)  |      |      |      |          |

<sup>1</sup>1-X,1-Y,1-Z



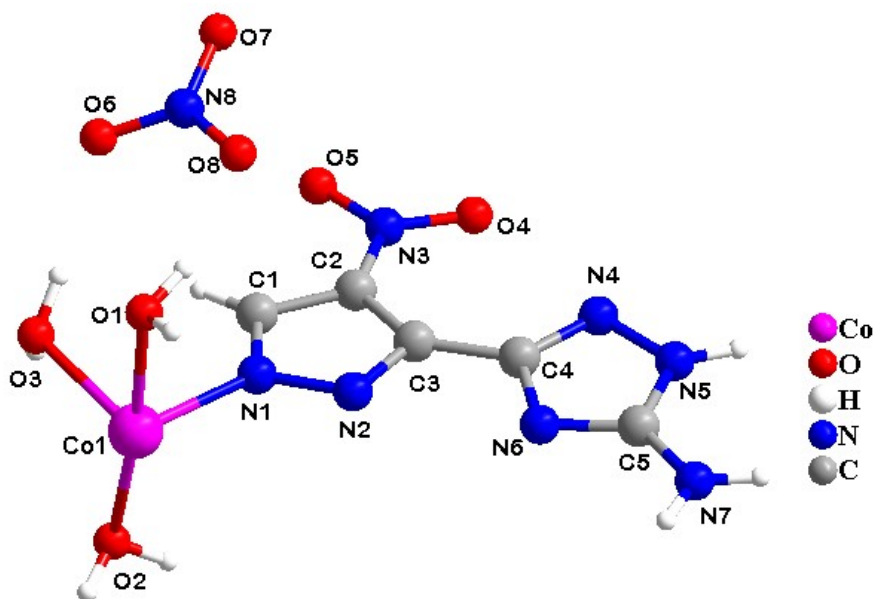

Figure S3. The asymmetric unit of compound 2.

Table S4. Crystal data and structure refinement for 2.

|                                        |                                                                              |
|----------------------------------------|------------------------------------------------------------------------------|
| CCDC No.                               | 2258459                                                                      |
| Identification code                    | 2                                                                            |
| Empirical formula                      | $C_{10}H_{20}Co_2N_{16}O_{16}$                                               |
| Formula weight                         | 738.28                                                                       |
| Temperature/K                          | 100                                                                          |
| Crystal system                         | triclinic                                                                    |
| Space group                            | <i>P</i> -1                                                                  |
| <i>a</i> /Å                            | 8.822(4)                                                                     |
| <i>b</i> /Å                            | 9.267(4)                                                                     |
| <i>c</i> /Å                            | 9.384(4)                                                                     |
| $\alpha$ /°                            | 94.197(14)                                                                   |
| $\beta$ /°                             | 108.760(13)                                                                  |
| $\gamma$ /°                            | 116.565(12)                                                                  |
| Volume/Å <sup>3</sup>                  | 628.0(5)                                                                     |
| <i>Z</i>                               | 1                                                                            |
| $\rho_{\text{calc}}$ /cm <sup>3</sup>  | 1.952                                                                        |
| $\mu$ /mm <sup>-1</sup>                | 1.430                                                                        |
| <i>F</i> (000)                         | 374.0                                                                        |
| Crystal size/mm <sup>3</sup>           | 0.12 × 0.1 × 0.1                                                             |
| Radiation                              | MoK $\alpha$ ( $\lambda$ = 0.71073)                                          |
| 2 $\theta$ range for data collection/° | 4.742 to 56.912                                                              |
| Index ranges                           | -11 ≤ <i>h</i> ≤ 11, -12 ≤ <i>k</i> ≤ 12, -12 ≤ <i>l</i> ≤ 12                |
| Reflections collected                  | 11056                                                                        |
| Independent reflections                | 3130 [ <i>R</i> <sub>int</sub> = 0.0646, <i>R</i> <sub>sigma</sub> = 0.0589] |
| Data/restraints/parameters             | 3130/0/203                                                                   |

Goodness-of-fit on  $F^2$  1.047  
 Final R indexes [ $I \geq 2\sigma(I)$ ]  $R_1 = 0.0567$ ,  $wR_2 = 0.1458$   
 Final R indexes [all data]  $R_1 = 0.0754$ ,  $wR_2 = 0.1597$   
 Largest diff. peak/hole /  $e \text{ \AA}^{-3}$  1.30/-1.26

**Table S5. Bond Lengths for 2.**

| Atom | Atom            | Length/Å | Atom | Atom | Length/Å |
|------|-----------------|----------|------|------|----------|
| Co1  | O3              | 2.150(2) | N2   | C3   | 1.347(4) |
| Co1  | O2              | 2.107(3) | N6   | C4   | 1.366(4) |
| Co1  | O1              | 2.085(3) | N6   | C5   | 1.331(4) |
| Co1  | N2 <sup>1</sup> | 2.115(3) | N1   | C1   | 1.334(4) |
| Co1  | N6 <sup>1</sup> | 2.089(3) | N3   | C2   | 1.410(4) |
| Co1  | N1              | 2.101(3) | N5   | N4   | 1.385(4) |
| O8   | N8              | 1.255(4) | N5   | C5   | 1.340(4) |
| O4   | N3              | 1.233(4) | N4   | C4   | 1.325(4) |
| O5   | N3              | 1.241(4) | N7   | C5   | 1.348(5) |
| O6   | N8              | 1.242(4) | C4   | C3   | 1.451(5) |
| O7   | N8              | 1.263(4) | C3   | C2   | 1.396(4) |
| N2   | N1              | 1.365(4) | C1   | C2   | 1.398(5) |

<sup>1</sup>2-X,1-Y,1-Z

**Table S6. Bond Angles for 2.**

| Atom            | Atom | Atom             | Angle/°    | Atom | Atom | Atom | Angle/°  |
|-----------------|------|------------------|------------|------|------|------|----------|
| O2              | Co1  | O3               | 89.31(10)  | C1   | N1   | N2   | 108.4(3) |
| O2              | Co1  | N2 <sup>1</sup>  | 97.01(11)  | O4   | N3   | O5   | 123.5(3) |
| O1              | Co1  | O3               | 83.61(10)  | O4   | N3   | C2   | 119.1(3) |
| O1              | Co1  | O2               | 172.79(10) | O5   | N3   | C2   | 117.5(3) |
| O1              | Co1  | N2 <sup>1</sup>  | 89.50(11)  | O8   | N8   | O7   | 119.2(3) |
| O1              | Co1  | N6 <sup>1</sup>  | 91.19(11)  | O6   | N8   | O8   | 120.8(3) |
| O1              | Co1  | N1               | 90.45(11)  | O6   | N8   | O7   | 119.9(3) |
| N2 <sup>1</sup> | Co1  | O3               | 163.85(10) | C5   | N5   | N4   | 110.8(3) |
| N6 <sup>1</sup> | Co1  | O3               | 89.48(10)  | C4   | N4   | N5   | 101.5(3) |
| N6 <sup>1</sup> | Co1  | O2               | 87.38(11)  | N6   | C4   | C3   | 115.1(3) |
| N6 <sup>1</sup> | Co1  | N2 <sup>1</sup>  | 76.04(11)  | N4   | C4   | N6   | 114.7(3) |
| N6 <sup>1</sup> | Co1  | N1               | 178.34(11) | N4   | C4   | C3   | 130.2(3) |
| N1              | Co1  | O3               | 90.56(11)  | N2   | C3   | C4   | 114.5(3) |
| N1              | Co1  | O2               | 90.96(10)  | N2   | C3   | C2   | 107.5(3) |
| N1              | Co1  | N2 <sup>1</sup>  | 104.12(11) | C2   | C3   | C4   | 137.9(3) |
| N1              | N2   | Co1 <sup>1</sup> | 133.3(2)   | N1   | C1   | C2   | 108.7(3) |

**Table S6. Bond Angles for 2.**

| Atom | Atom | Atom             | Angle/°  | Atom | Atom | Atom | Angle/°  |
|------|------|------------------|----------|------|------|------|----------|
| C3   | N2   | Co1 <sup>1</sup> | 117.2(2) | C3   | C2   | N3   | 129.4(3) |
| C3   | N2   | N1               | 109.3(3) | C3   | C2   | C1   | 106.0(3) |
| C4   | N6   | Co1 <sup>1</sup> | 117.0(2) | C1   | C2   | N3   | 124.6(3) |
| C5   | N6   | Co1 <sup>1</sup> | 138.8(2) | N6   | C5   | N5   | 109.1(3) |
| C5   | N6   | C4               | 103.9(3) | N6   | C5   | N7   | 126.3(3) |
| N2   | N1   | Co1              | 122.2(2) | N5   | C5   | N7   | 124.6(3) |
| C1   | N1   | Co1              | 129.2(2) |      |      |      |          |

<sup>1</sup>2-X,1-Y,1-Z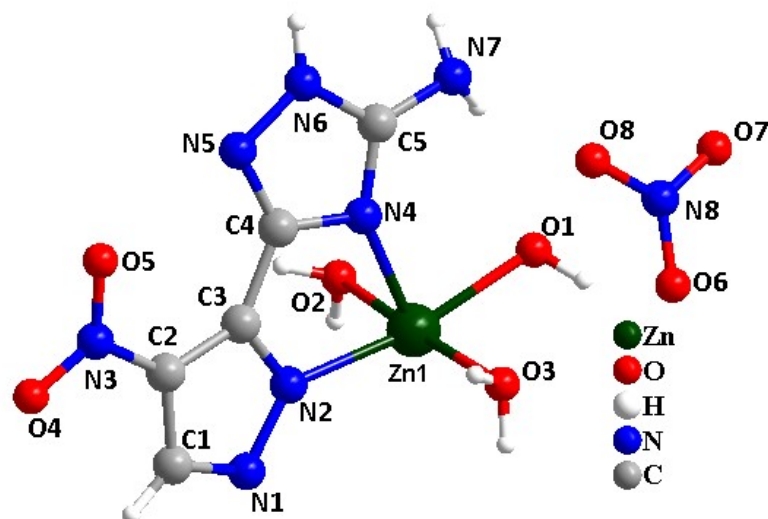**Figure S4.** The asymmetric unit of compound 3.**Table S7. Crystal data and structure refinement for 3.**

|                     |                                                                 |
|---------------------|-----------------------------------------------------------------|
| CCDC No.            | 2258462                                                         |
| Identification code | 3                                                               |
| Empirical formula   | C <sub>5</sub> H <sub>10</sub> N <sub>8</sub> O <sub>8</sub> Zn |
| Formula weight      | 375.58                                                          |
| Temperature/K       | 100                                                             |
| Crystal system      | monoclinic                                                      |
| Space group         | <i>P2<sub>1</sub>/n</i>                                         |
| <i>a</i> /Å         | 8.841(3)                                                        |
| <i>b</i> /Å         | 13.320(5)                                                       |
| <i>c</i> /Å         | 10.831(4)                                                       |
| $\alpha$ /°         | 90                                                              |
| $\beta$ /°          | 99.819(9)                                                       |

|                                                |                                                               |
|------------------------------------------------|---------------------------------------------------------------|
| $\gamma/^\circ$                                | 90                                                            |
| Volume/ $\text{\AA}^3$                         | 1256.8(7)                                                     |
| Z                                              | 4                                                             |
| $\rho_{\text{calc}}/\text{g/cm}^3$             | 1.985                                                         |
| $\mu/\text{mm}^{-1}$                           | 2.018                                                         |
| F(000)                                         | 760.0                                                         |
| Crystal size/ $\text{mm}^3$                    | $0.12 \times 0.1 \times 0.1$                                  |
| Radiation                                      | MoK $\alpha$ ( $\lambda = 0.71073$ )                          |
| 2 $\Theta$ range for data collection/ $^\circ$ | 6.118 to 56.752                                               |
| Index ranges                                   | $-11 \leq h \leq 11, -17 \leq k \leq 17, -14 \leq l \leq 14$  |
| Reflections collected                          | 19003                                                         |
| Independent reflections                        | 3132 [ $R_{\text{int}} = 0.0675, R_{\text{sigma}} = 0.0437$ ] |
| Data/restraints/parameters                     | 3132/0/203                                                    |
| Goodness-of-fit on $F^2$                       | 1.060                                                         |
| Final R indexes [ $I \geq 2\sigma(I)$ ]        | $R_1 = 0.0373, wR_2 = 0.0839$                                 |
| Final R indexes [all data]                     | $R_1 = 0.0521, wR_2 = 0.0920$                                 |
| Largest diff. peak/hole / $e \text{\AA}^{-3}$  | 0.68/-0.63                                                    |

**Table S8. Bond Lengths for 3.**

| Atom | Atom            | Length/ $\text{\AA}$ | Atom | Atom | Length/ $\text{\AA}$ |
|------|-----------------|----------------------|------|------|----------------------|
| Zn1  | O1              | 2.123(2)             | N4   | C5   | 1.332(3)             |
| Zn1  | O3              | 2.176(2)             | N1   | N2   | 1.372(3)             |
| Zn1  | O2              | 2.182(2)             | N1   | C1   | 1.334(3)             |
| Zn1  | N4 <sup>1</sup> | 2.095(2)             | N3   | C2   | 1.421(3)             |
| Zn1  | N1              | 2.060(2)             | N5   | N6   | 1.384(3)             |
| Zn1  | N2 <sup>1</sup> | 2.161(2)             | N5   | C4   | 1.316(3)             |
| O7   | N8              | 1.261(3)             | N2   | C3   | 1.347(3)             |
| O5   | N3              | 1.232(3)             | N6   | C5   | 1.353(3)             |
| O4   | N3              | 1.241(3)             | N7   | C5   | 1.347(4)             |
| O6   | N8              | 1.249(3)             | C4   | C3   | 1.462(4)             |
| O8   | N8              | 1.260(3)             | C1   | C2   | 1.394(4)             |
| N4   | C4              | 1.373(3)             | C2   | C3   | 1.404(4)             |

<sup>1</sup>1-X,1-Y,1-Z

**Table S9. Bond Angles for 3.**

| Atom | Atom | Atom            | Angle/ $^\circ$ | Atom | Atom | Atom             | Angle/ $^\circ$ |
|------|------|-----------------|-----------------|------|------|------------------|-----------------|
| O1   | Zn1  | O3              | 84.54(8)        | O4   | N3   | C2               | 117.3(2)        |
| O1   | Zn1  | O2              | 90.51(8)        | C4   | N5   | N6               | 102.1(2)        |
| O1   | Zn1  | N2 <sup>1</sup> | 164.57(8)       | N1   | N2   | Zn1 <sup>1</sup> | 135.06(16)      |

**Table S9. Bond Angles for 3.**

| Atom            | Atom | Atom             | Angle/°    | Atom | Atom | Atom             | Angle/°    |
|-----------------|------|------------------|------------|------|------|------------------|------------|
| O3              | Zn1  | O2               | 173.40(8)  | C3   | N2   | Zn1 <sup>1</sup> | 115.70(18) |
| N4 <sup>1</sup> | Zn1  | O1               | 88.97(8)   | C3   | N2   | N1               | 109.1(2)   |
| N4 <sup>1</sup> | Zn1  | O3               | 95.00(9)   | C5   | N6   | N5               | 110.2(2)   |
| N4 <sup>1</sup> | Zn1  | O2               | 89.27(9)   | O6   | N8   | O7               | 120.6(2)   |
| N4 <sup>1</sup> | Zn1  | N2 <sup>1</sup>  | 76.60(9)   | O6   | N8   | O8               | 120.4(2)   |
| N1              | Zn1  | O1               | 92.26(8)   | O8   | N8   | O7               | 119.0(2)   |
| N1              | Zn1  | O3               | 87.41(8)   | N4   | C4   | C3               | 116.0(2)   |
| N1              | Zn1  | O2               | 88.42(9)   | N5   | C4   | N4               | 114.9(2)   |
| N1              | Zn1  | N4 <sup>1</sup>  | 177.39(9)  | N5   | C4   | C3               | 128.9(2)   |
| N1              | Zn1  | N2 <sup>1</sup>  | 102.38(9)  | N4   | C5   | N6               | 109.0(2)   |
| N2 <sup>1</sup> | Zn1  | O3               | 91.19(8)   | N4   | C5   | N7               | 126.3(3)   |
| N2 <sup>1</sup> | Zn1  | O2               | 94.70(9)   | N7   | C5   | N6               | 124.6(3)   |
| C4              | N4   | Zn1 <sup>1</sup> | 115.99(18) | N1   | C1   | C2               | 108.6(2)   |
| C5              | N4   | Zn1 <sup>1</sup> | 137.90(19) | C1   | C2   | N3               | 123.9(2)   |
| C5              | N4   | C4               | 103.7(2)   | C1   | C2   | C3               | 106.3(2)   |
| N2              | N1   | Zn1              | 122.13(15) | C3   | C2   | N3               | 129.8(2)   |
| C1              | N1   | Zn1              | 129.09(19) | N2   | C3   | C4               | 114.8(2)   |
| C1              | N1   | N2               | 108.6(2)   | N2   | C3   | C2               | 107.4(2)   |
| O5              | N3   | O4               | 123.5(2)   | C2   | C3   | C4               | 137.8(2)   |
| O5              | N3   | C2               | 119.2(2)   |      |      |                  |            |

<sup>1</sup>1-X,1-Y,1-Z

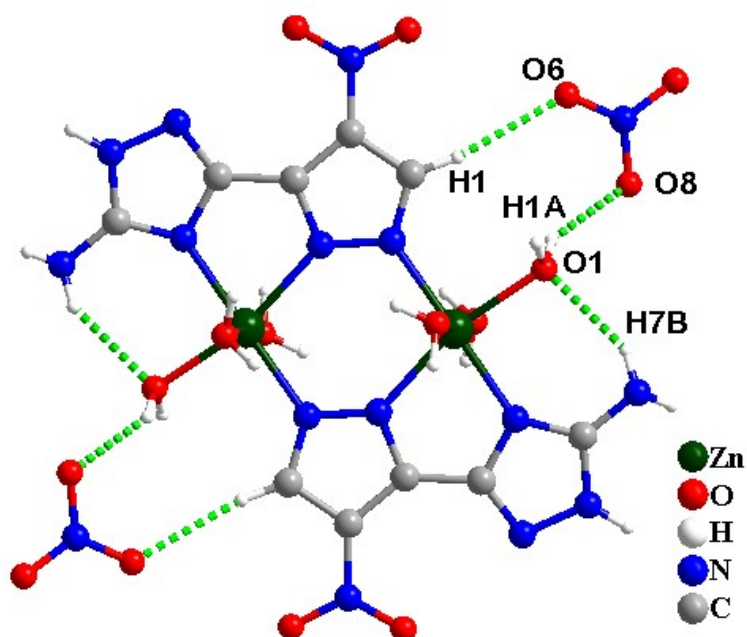

**Figure S5.** Inter/Intramolecular hydrogen bonding interaction in **3**.

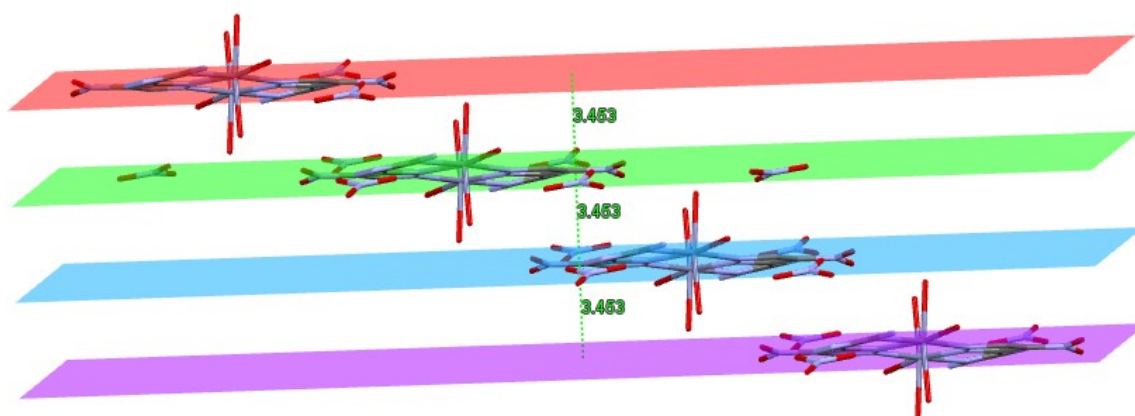

Figure S6. Interplanar distance present in 3.

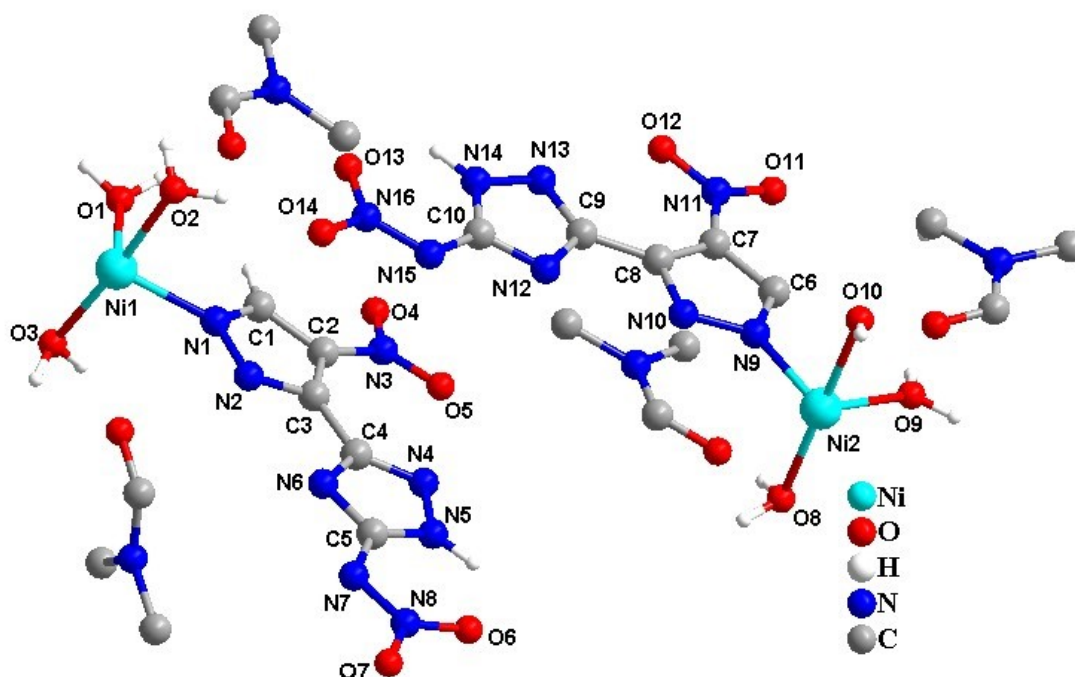

Figure S7. The asymmetric unit of 4.

Table S10. Crystal data and structure refinement for 4.

|                       |                                |
|-----------------------|--------------------------------|
| CCDC No.              | 2258464                        |
| Identification code   | 4                              |
| Empirical formula     | $C_{10}H_{16}N_{16}Ni_2O_{14}$ |
| Formula weight        | 701.81                         |
| Temperature/K         | 100                            |
| Crystal system        | triclinic                      |
| Space group           | <i>P</i> -1                    |
| <i>a</i> /Å           | 11.6407(7)                     |
| <i>b</i> /Å           | 12.0947(7)                     |
| <i>c</i> /Å           | 15.6754(9)                     |
| $\alpha$ /°           | 68.215(2)                      |
| $\beta$ /°            | 87.615(2)                      |
| $\gamma$ /°           | 85.471(2)                      |
| Volume/Å <sup>3</sup> | 2042.8(2)                      |

<sup>1</sup>-X,2-Y,1-Z; <sup>2</sup>1-X,1-Y,2-Z

**Table S11. Bond Lengths for 4.**

| Atom | Atom | Length/<br>Å | Atom | Atom | Length/<br>Å |
|------|------|--------------|------|------|--------------|
| Ni1  | O2   | 2.105(4)     | N10  | C8   | 1.333(7)     |
| Ni1  | O3   | 2.101(4)     | N12  | C9   | 1.366(7)     |
| Ni1  | O1   | 2.092(4)     | N12  | C10  | 1.322(6)     |
| Ni1  | N61  | 2.076(4)     | N2   | C3   | 1.333(7)     |
| Ni1  | N1   | 2.033(4)     | N9   | C6   | 1.337(7)     |
| Ni1  | N21  | 2.103(4)     | N3   | C2   | 1.382(7)     |
| Ni2  | O10  | 2.115(4)     | N15  | N16  | 1.308(6)     |
| Ni2  | O9   | 2.096(4)     | N15  | C10  | 1.373(7)     |
| Ni2  | O8   | 2.102(4)     | N7   | N8   | 1.309(6)     |
| Ni2  | N102 | 2.083(4)     | N7   | C5   | 1.403(7)     |
| Ni2  | N122 | 2.076(4)     | N14  | N13  | 1.370(6)     |
| Ni2  | N9   | 2.037(4)     | N14  | C10  | 1.353(7)     |
| O7   | N8   | 1.274(6)     | O11  | N11  | 1.251(6)     |
| O14  | N16  | 1.251(6)     | N13  | C9   | 1.312(7)     |
| O13  | N16  | 1.264(6)     | N4   | N5   | 1.387(6)     |
| O6   | N8   | 1.256(6)     | N4   | C4   | 1.343(6)     |
| O5   | N3   | 1.245(6)     | N5   | C5   | 1.332(7)     |
| N6   | C4   | 1.320(7)     | N11  | C7   | 1.407(7)     |
| N6   | C5   | 1.329(6)     | C3   | C2   | 1.419(7)     |
| O12  | N11  | 1.218(6)     | C3   | C4   | 1.468(7)     |
| O4   | N3   | 1.235(6)     | C2   | C1   | 1.389(7)     |
| N1   | N2   | 1.360(6)     | C8   | C9   | 1.462(7)     |
| N1   | C1   | 1.346(7)     | C8   | C7   | 1.397(7)     |
| N10  | N9   | 1.345(6)     | C6   | C7   | 1.387(7)     |

<sup>1</sup>-X,2-Y,1-Z; <sup>2</sup>1-X,1-Y,2-Z

**Table S12. Bond Angles for 4.**

| Atom            | Atom | Atom            | Angle/°    | Atom | Atom | Atom | Angle/°  |
|-----------------|------|-----------------|------------|------|------|------|----------|
| O3              | Ni1  | O2              | 176.21(15) | C6   | N9   | Ni2  | 125.6(4) |
| O3              | Ni1  | N2 <sup>1</sup> | 91.72(17)  | C6   | N9   | N10  | 109.5(4) |
| O1              | Ni1  | O2              | 93.23(15)  | O5   | N3   | C2   | 118.5(4) |
| O1              | Ni1  | O3              | 86.27(16)  | O4   | N3   | O5   | 121.9(5) |
| O1              | Ni1  | N2 <sup>1</sup> | 167.38(15) | O4   | N3   | C2   | 119.6(4) |
| N6 <sup>1</sup> | Ni1  | O2              | 90.15(16)  | N16  | N15  | C10  | 118.0(4) |
| N6 <sup>1</sup> | Ni1  | O3              | 86.09(17)  | N8   | N7   | C5   | 116.3(4) |
| N6 <sup>1</sup> | Ni1  | O1              | 89.48(15)  | C10  | N14  | N13  | 109.9(4) |
| N6 <sup>1</sup> | Ni1  | N2 <sup>1</sup> | 77.95(16)  | O7   | N8   | N7   | 116.8(4) |
| N1              | Ni1  | O2              | 91.27(17)  | O6   | N8   | O7   | 120.7(4) |
| N1              | Ni1  | O3              | 92.51(17)  | O6   | N8   | N7   | 122.5(5) |
| N1              | Ni1  | O1              | 93.13(16)  | O14  | N16  | O13  | 119.5(4) |
| N1              | Ni1  | N6 <sup>1</sup> | 176.95(17) | O14  | N16  | N15  | 118.5(4) |
| N1              | Ni1  | N2 <sup>1</sup> | 99.40(17)  | O13  | N16  | N15  | 122.0(4) |

|                  |     |                  |            |     |     |     |          |
|------------------|-----|------------------|------------|-----|-----|-----|----------|
| N21              | Ni1 | O2               | 87.95(15)  | C9  | N13 | N14 | 103.3(4) |
| O9               | Ni2 | O10              | 91.88(17)  | C4  | N4  | N5  | 100.7(4) |
| O9               | Ni2 | O8               | 88.93(18)  | C5  | N5  | N4  | 110.8(4) |
| O8               | Ni2 | O10              | 178.62(16) | O12 | N11 | O11 | 123.6(5) |
| N10 <sup>2</sup> | Ni2 | O10              | 89.15(16)  | O12 | N11 | C7  | 119.7(4) |
| N10 <sup>2</sup> | Ni2 | O9               | 166.48(16) | O11 | N11 | C7  | 116.7(4) |
| N10 <sup>2</sup> | Ni2 | O8               | 89.80(17)  | N2  | C3  | C2  | 108.6(4) |
| N12 <sup>2</sup> | Ni2 | O10              | 91.43(16)  | N2  | C3  | C4  | 114.6(5) |
| N12 <sup>2</sup> | Ni2 | O9               | 88.13(16)  | C2  | C3  | C4  | 136.8(5) |
| N12 <sup>2</sup> | Ni2 | O8               | 87.48(18)  | N3  | C2  | C3  | 131.4(5) |
| N12 <sup>2</sup> | Ni2 | N10 <sup>2</sup> | 78.36(17)  | N3  | C2  | C1  | 124.3(5) |
| N9               | Ni2 | O10              | 88.80(17)  | C1  | C2  | C3  | 104.3(4) |
| N9               | Ni2 | O9               | 93.62(17)  | N6  | C4  | N4  | 114.6(4) |
| N9               | Ni2 | O8               | 92.26(18)  | N6  | C4  | C3  | 117.2(4) |
| N9               | Ni2 | N10 <sup>2</sup> | 99.88(17)  | N4  | C4  | C3  | 128.1(5) |
| N9               | Ni2 | N12 <sup>2</sup> | 178.23(17) | N10 | C8  | C9  | 114.8(4) |
| C4               | N6  | Ni1 <sup>1</sup> | 115.0(3)   | N10 | C8  | C7  | 108.4(4) |
| C4               | N6  | C5               | 105.6(4)   | C7  | C8  | C9  | 136.7(5) |
| C5               | N6  | Ni1 <sup>1</sup> | 139.0(4)   | N12 | C9  | C8  | 116.3(4) |
| N2               | N1  | Ni1              | 125.1(3)   | N13 | C9  | N12 | 113.4(5) |
| C1               | N1  | Ni1              | 127.0(4)   | N13 | C9  | C8  | 130.3(5) |
| C1               | N1  | N2               | 107.9(4)   | N1  | C1  | C2  | 109.8(4) |
| N9               | N10 | Ni2 <sup>2</sup> | 135.3(3)   | N12 | C10 | N15 | 119.6(5) |
| C8               | N10 | Ni2 <sup>2</sup> | 116.1(3)   | N12 | C10 | N14 | 108.5(4) |
| C8               | N10 | N9               | 108.6(4)   | N14 | C10 | N15 | 131.9(5) |
| C9               | N12 | Ni2 <sup>2</sup> | 114.2(3)   | N6  | C5  | N7  | 119.6(5) |
| C10              | N12 | Ni2 <sup>2</sup> | 140.4(4)   | N6  | C5  | N5  | 108.3(5) |
| C10              | N12 | C9               | 105.0(4)   | N5  | C5  | N7  | 131.8(5) |
| N1               | N2  | Ni1 <sup>1</sup> | 135.5(3)   | N9  | C6  | C7  | 108.0(5) |
| C3               | N2  | Ni1 <sup>1</sup> | 115.1(3)   | C8  | C7  | N11 | 129.9(5) |
| C3               | N2  | N1               | 109.4(4)   | C6  | C7  | N11 | 124.6(5) |
| N10              | N9  | Ni2              | 124.8(3)   | C6  | C7  | C8  | 105.5(5) |

<sup>1</sup>-X,2-Y,1-Z; <sup>2</sup>1-X,1-Y,2-Z



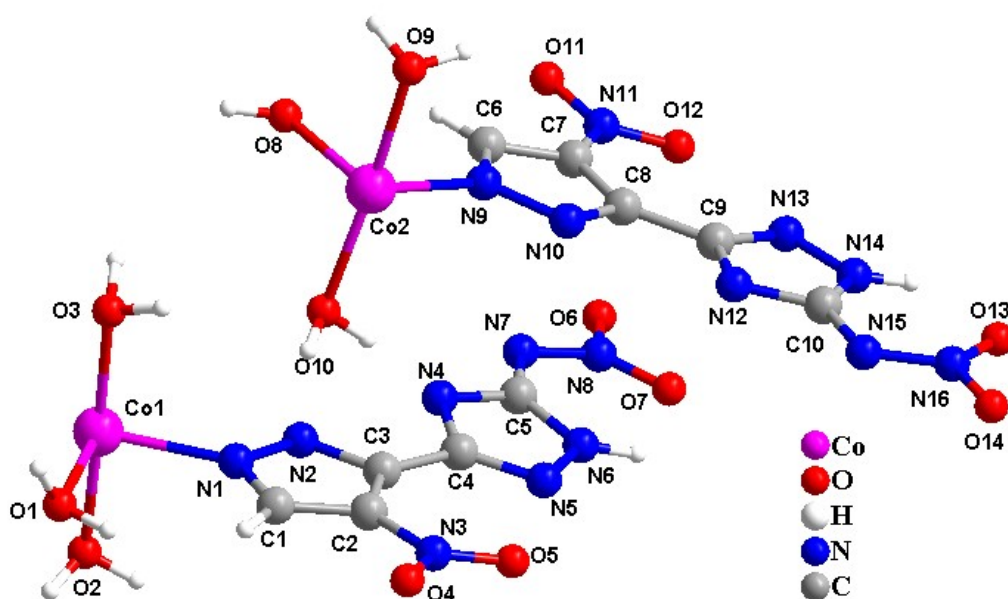

Figure S8. The asymmetric unit of **5**.

Table S13. Crystal data and structure refinement for **5**.

|                                        |                                                               |
|----------------------------------------|---------------------------------------------------------------|
| CCDC No.                               | 2258460                                                       |
| Identification code                    | 5                                                             |
| Empirical formula                      | $C_{10}H_{16}Co_2N_{16}O_{14}$                                |
| Formula weight                         | 702.25                                                        |
| Temperature/K                          | 100                                                           |
| Crystal system                         | triclinic                                                     |
| Space group                            | <i>P</i> -1                                                   |
| <i>a</i> /Å                            | 11.507(4)                                                     |
| <i>b</i> /Å                            | 12.980(5)                                                     |
| <i>c</i> /Å                            | 14.249(5)                                                     |
| $\alpha$ /°                            | 72.344(11)                                                    |
| $\beta$ /°                             | 75.743(12)                                                    |
| $\gamma$ /°                            | 71.317(10)                                                    |
| Volume/Å <sup>3</sup>                  | 1894.7(12)                                                    |
| <i>Z</i>                               | 2                                                             |
| $\rho_{\text{calc}}/\text{cm}^3$       | 1.231                                                         |
| $\mu/\text{mm}^{-1}$                   | 0.941                                                         |
| <i>F</i> (000)                         | 708.0                                                         |
| Crystal size/mm <sup>3</sup>           | 0.12 × 0.12 × 0.1                                             |
| Radiation                              | MoK $\alpha$ ( $\lambda$ = 0.71073)                           |
| 2 $\theta$ range for data collection/° | 4.374 to 57.192                                               |
| Index ranges                           | -15 ≤ <i>h</i> ≤ 15, -17 ≤ <i>k</i> ≤ 17, -19 ≤ <i>l</i> ≤ 19 |
| Reflections collected                  | 28328                                                         |

|                                                |                                                                  |
|------------------------------------------------|------------------------------------------------------------------|
| Independent reflections                        | 9391 [ $R_{\text{int}} = 0.0853$ , $R_{\text{sigma}} = 0.0935$ ] |
| Data/restraints/parameters                     | 9391/1/388                                                       |
| Goodness-of-fit on $F^2$                       | 1.047                                                            |
| Final R indexes [ $I \geq 2\sigma(I)$ ]        | $R_1 = 0.0910$ , $wR_2 = 0.2701$                                 |
| Final R indexes [all data]                     | $R_1 = 0.1198$ , $wR_2 = 0.2982$                                 |
| Largest diff. peak/hole / $e \text{ \AA}^{-3}$ | 1.82/-1.14                                                       |

**Table S14. Bond Lengths for 5.**

| Atom | Atom             | Length/Å | Atom | Atom | Length/Å |
|------|------------------|----------|------|------|----------|
| Co2  | O9               | 2.137(4) | N4   | C5   | 1.354(7) |
| Co2  | O8               | 2.141(4) | N4   | C4   | 1.382(7) |
| Co2  | O10              | 2.120(4) | N13  | N14  | 1.381(6) |
| Co2  | N12 <sup>1</sup> | 2.122(5) | N13  | C9   | 1.325(7) |
| Co2  | N10 <sup>1</sup> | 2.123(4) | O5   | N3   | 1.246(7) |
| Co2  | N9               | 2.115(5) | N6   | C5   | 1.361(7) |
| Co1  | O3               | 2.118(4) | N14  | C10  | 1.341(7) |
| Co1  | O2               | 2.148(4) | N9   | C6   | 1.333(7) |
| Co1  | O1               | 2.131(4) | N15  | N16  | 1.321(7) |
| Co1  | N4 <sup>2</sup>  | 2.142(5) | N15  | C10  | 1.379(7) |
| Co1  | N2 <sup>2</sup>  | 2.135(5) | O4   | N3   | 1.228(7) |
| Co1  | N1               | 2.103(5) | N2   | N1   | 1.369(6) |
| O6   | N8               | 1.268(6) | N2   | C3   | 1.359(7) |
| O14  | N16              | 1.279(7) | N7   | N8   | 1.331(7) |
| O7   | N8               | 1.259(7) | N7   | C5   | 1.361(8) |
| O11  | N11              | 1.257(7) | N11  | C7   | 1.418(7) |
| N12  | C10              | 1.354(7) | N1   | C1   | 1.338(8) |
| N12  | C9               | 1.368(7) | N3   | C2   | 1.432(8) |
| N10  | N9               | 1.385(6) | C4   | C3   | 1.483(8) |
| N10  | C8               | 1.356(7) | C3   | C2   | 1.403(8) |
| N5   | N6               | 1.374(6) | C1   | C2   | 1.404(8) |
| N5   | C4               | 1.323(8) | C9   | C8   | 1.471(8) |
| O12  | N11              | 1.246(7) | C7   | C8   | 1.413(8) |
| O13  | N16              | 1.233(7) | C7   | C6   | 1.416(8) |

<sup>1</sup>-X,2-Y,1-Z; <sup>2</sup>1-X,1-Y,-Z

**Table S15. Bond Angles for 5.**

| Atom             | Atom | Atom             | Angle/°    | Atom | Atom | Atom             | Angle/°  |
|------------------|------|------------------|------------|------|------|------------------|----------|
| O9               | Co2  | O8               | 92.02(18)  | N16  | N15  | C10              | 115.8(5) |
| O10              | Co2  | O9               | 174.20(16) | N1   | N2   | Co1 <sup>2</sup> | 134.3(4) |
| O10              | Co2  | O8               | 89.12(18)  | C3   | N2   | Co1 <sup>2</sup> | 116.6(4) |
| O10              | Co2  | N12 <sup>1</sup> | 87.11(18)  | C3   | N2   | N1               | 108.9(4) |
| O10              | Co2  | N10 <sup>1</sup> | 90.20(17)  | N8   | N7   | C5               | 116.4(5) |
| N12 <sup>1</sup> | Co2  | O9               | 87.23(18)  | O14  | N16  | N15              | 117.0(5) |

**Table S15. Bond Angles for 5.**

| Atom             | Atom | Atom             | Angle/°    | Atom | Atom | Atom | Angle/°  |
|------------------|------|------------------|------------|------|------|------|----------|
| N12 <sup>1</sup> | Co2  | O8               | 88.59(18)  | O13  | N16  | O14  | 118.4(5) |
| N12 <sup>1</sup> | Co2  | N10 <sup>1</sup> | 77.39(18)  | O13  | N16  | N15  | 124.5(5) |
| N10 <sup>1</sup> | Co2  | O9               | 87.31(17)  | O11  | N11  | C7   | 118.6(5) |
| N10 <sup>1</sup> | Co2  | O8               | 165.98(17) | O12  | N11  | O11  | 122.5(5) |
| N9               | Co2  | O9               | 92.54(18)  | O12  | N11  | C7   | 118.9(5) |
| N9               | Co2  | O8               | 93.62(17)  | O6   | N8   | N7   | 116.0(5) |
| N9               | Co2  | O10              | 93.06(18)  | O7   | N8   | O6   | 121.4(5) |
| N9               | Co2  | N12 <sup>1</sup> | 177.78(18) | O7   | N8   | N7   | 122.6(5) |
| N9               | Co2  | N10 <sup>1</sup> | 100.40(18) | N2   | N1   | Co1  | 122.5(4) |
| O3               | Co1  | O2               | 178.46(18) | C1   | N1   | Co1  | 128.4(4) |
| O3               | Co1  | O1               | 91.12(19)  | C1   | N1   | N2   | 109.0(5) |
| O3               | Co1  | N4 <sup>2</sup>  | 86.32(19)  | O5   | N3   | C2   | 117.9(5) |
| O3               | Co1  | N2 <sup>2</sup>  | 90.14(19)  | O4   | N3   | O5   | 124.1(5) |
| O1               | Co1  | O2               | 89.71(18)  | O4   | N3   | C2   | 118.0(5) |
| O1               | Co1  | N4 <sup>2</sup>  | 87.49(18)  | N4   | C5   | N6   | 108.1(5) |
| O1               | Co1  | N2 <sup>2</sup>  | 164.34(19) | N4   | C5   | N7   | 119.4(5) |
| N4 <sup>2</sup>  | Co1  | O2               | 92.42(18)  | N7   | C5   | N6   | 132.5(5) |
| N2 <sup>2</sup>  | Co1  | O2               | 88.70(18)  | N5   | C4   | N4   | 113.5(5) |
| N2 <sup>2</sup>  | Co1  | N4 <sup>2</sup>  | 77.01(18)  | N5   | C4   | C3   | 130.9(5) |
| N1               | Co1  | O3               | 91.9(2)    | N4   | C4   | C3   | 115.6(5) |
| N1               | Co1  | O2               | 89.36(19)  | N12  | C10  | N15  | 119.1(5) |
| N1               | Co1  | O1               | 92.70(19)  | N14  | C10  | N12  | 108.5(5) |
| N1               | Co1  | N4 <sup>2</sup>  | 178.2(2)   | N14  | C10  | N15  | 132.3(5) |
| N1               | Co1  | N2 <sup>2</sup>  | 102.86(18) | N2   | C3   | C4   | 115.3(5) |
| C10              | N12  | Co2 <sup>1</sup> | 140.7(4)   | N2   | C3   | C2   | 107.4(5) |
| C10              | N12  | C9               | 104.3(5)   | C2   | C3   | C4   | 137.3(5) |
| C9               | N12  | Co2 <sup>1</sup> | 114.9(4)   | N1   | C1   | C2   | 108.3(5) |
| N9               | N10  | Co2 <sup>1</sup> | 135.1(3)   | N12  | C9   | C8   | 116.4(5) |
| C8               | N10  | Co2 <sup>1</sup> | 116.1(4)   | N13  | C9   | N12  | 113.7(5) |
| C8               | N10  | N9               | 108.7(4)   | N13  | C9   | C8   | 129.8(5) |
| C4               | N5   | N6               | 103.5(5)   | C8   | C7   | N11  | 130.1(5) |
| C5               | N4   | Co1 <sup>2</sup> | 139.4(4)   | C8   | C7   | C6   | 105.1(5) |
| C5               | N4   | C4               | 104.3(5)   | C6   | C7   | N11  | 124.8(5) |
| C4               | N4   | Co1 <sup>2</sup> | 115.3(4)   | C3   | C2   | N3   | 129.0(5) |
| C9               | N13  | N14              | 103.0(5)   | C3   | C2   | C1   | 106.3(5) |
| C5               | N6   | N5               | 110.5(5)   | C1   | C2   | N3   | 124.8(6) |
| C10              | N14  | N13              | 110.6(4)   | N10  | C8   | C9   | 115.1(5) |
| N10              | N9   | Co2              | 124.5(3)   | N10  | C8   | C7   | 108.2(5) |
| C6               | N9   | Co2              | 126.9(4)   | C7   | C8   | C9   | 136.7(5) |
| C6               | N9   | N10              | 108.6(5)   | N9   | C6   | C7   | 109.3(5) |

<sup>1</sup>-X,<sup>2</sup>-Y,<sup>1</sup>-Z; <sup>2</sup>1-X,<sup>1</sup>-Y,-Z

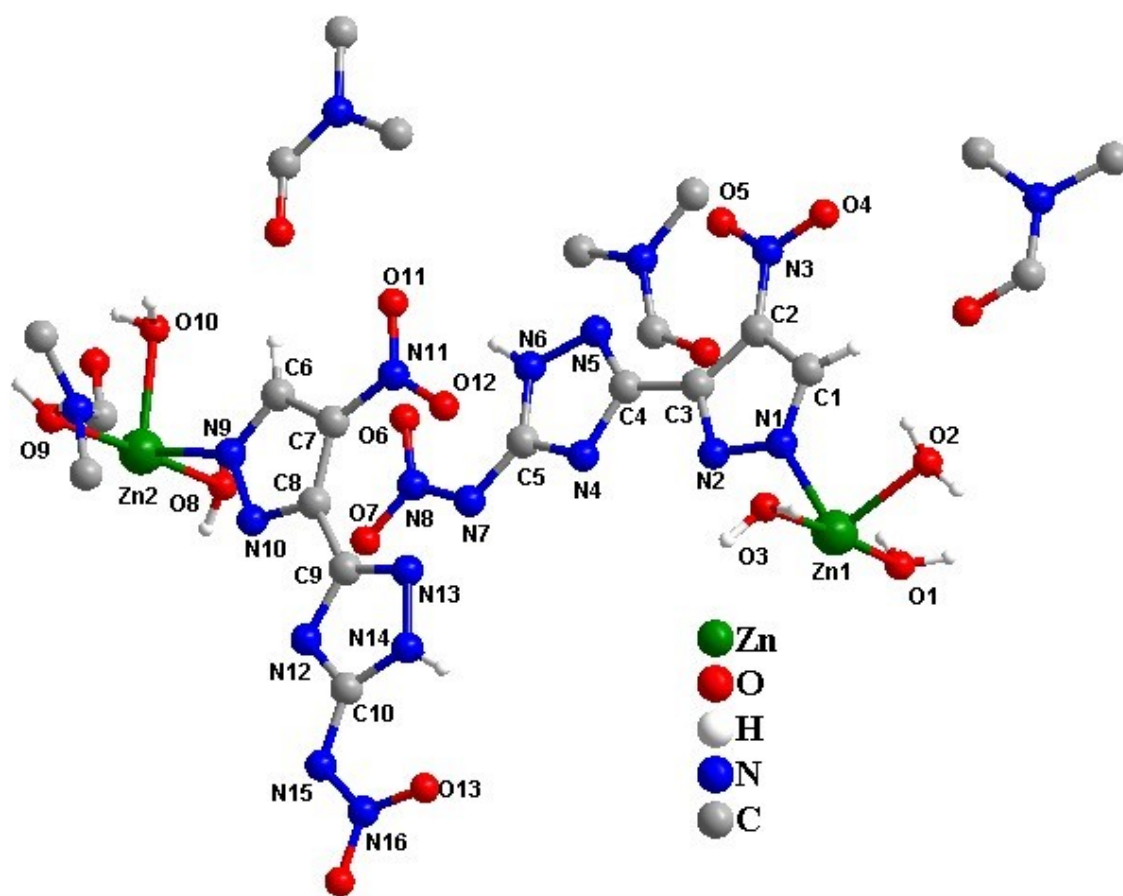

Figure S9. The asymmetric unit of 6.

Table S16. Crystal data and structure refinement for 6.

|                                |                                |
|--------------------------------|--------------------------------|
| CCDC No.                       | 2258461                        |
| Identification code            | 6                              |
| Empirical formula              | $C_{10}H_{16}N_{16}O_{14}Zn_2$ |
| Formula weight                 | 715.13                         |
| Temperature/K                  | 100                            |
| Crystal system                 | triclinic                      |
| Space group                    | <i>P</i> -1                    |
| <i>a</i> /Å                    | 11.7885(4)                     |
| <i>b</i> /Å                    | 12.0697(4)                     |
| <i>c</i> /Å                    | 15.7929(6)                     |
| $\alpha$ /°                    | 68.2650(10)                    |
| $\beta$ /°                     | 87.1700(10)                    |
| $\gamma$ /°                    | 84.8060(10)                    |
| Volume/Å <sup>3</sup>          | 2078.44(13)                    |
| Z                              | 2                              |
| $\rho_{calc}$ /cm <sup>3</sup> | 1.143                          |
| $\mu$ /mm <sup>-1</sup>        | 1.214                          |
| F(000)                         | 720.0                          |
| Crystal size/mm <sup>3</sup>   | 0.2 × 0.18 × 0.12              |

|                                                  |                                                                        |
|--------------------------------------------------|------------------------------------------------------------------------|
| Radiation                                        | MoK $\alpha$ ( $\lambda = 0.71073$ )                                   |
| 2 $\theta$ range for data collection/ $^{\circ}$ | 4.408 to 56.714                                                        |
| Index ranges                                     | -15 $\leq$ h $\leq$ 15, -16 $\leq$ k $\leq$ 16, -21 $\leq$ l $\leq$ 21 |
| Reflections collected                            | 34339                                                                  |
| Independent reflections                          | 10339 [Rint = 0.0379, Rsigma = 0.0396]                                 |
| Data/restraints/parameters                       | 10339/0/386                                                            |
| Goodness-of-fit on F2                            | 1.109                                                                  |
| Final R indexes [ $I > 2\sigma(I)$ ]             | R1 = 0.0493, wR2 = 0.1555                                              |
| Final R indexes [all data]                       | R1 = 0.0577, wR2 = 0.1623                                              |
| Largest diff. peak/hole / e $\text{\AA}^{-3}$    | 0.78/-0.70                                                             |

**Table S17. Bond Lengths for 6.**

| Atom | Atom | Length/ $\text{\AA}$ | Atom | Atom | Length/ $\text{\AA}$ |
|------|------|----------------------|------|------|----------------------|
| Zn2  | O8   | 2.153(3)             | N12  | C9   | 1.345(4)             |
| Zn2  | O10  | 2.128(2)             | O4   | N3   | 1.239(4)             |
| Zn2  | O9   | 2.167(3)             | N10  | N9   | 1.373(4)             |
| Zn2  | N121 | 2.117(3)             | N10  | C8   | 1.337(4)             |
| Zn2  | N101 | 2.174(3)             | N5   | N6   | 1.371(4)             |
| Zn2  | N9   | 2.054(3)             | N5   | C4   | 1.316(4)             |
| Zn1  | O1   | 2.183(3)             | N9   | C6   | 1.334(4)             |
| Zn1  | O3   | 2.198(3)             | N1   | N2   | 1.366(4)             |
| Zn1  | O2   | 2.108(3)             | N1   | C1   | 1.330(4)             |
| Zn1  | N42  | 2.132(3)             | N6   | C5   | 1.348(4)             |
| Zn1  | N1   | 2.041(3)             | N14  | N13  | 1.376(4)             |
| Zn1  | N22  | 2.146(3)             | N14  | C10  | 1.341(4)             |
| O14  | N16  | 1.263(4)             | N7   | N8   | 1.311(4)             |
| O6   | N8   | 1.251(4)             | N7   | C5   | 1.377(4)             |
| O7   | N8   | 1.257(4)             | N11  | C7   | 1.406(4)             |
| O5   | N3   | 1.222(4)             | N2   | C3   | 1.340(4)             |
| O13  | N16  | 1.245(4)             | N3   | C2   | 1.424(4)             |
| O11  | N11  | 1.240(4)             | N13  | C9   | 1.326(4)             |
| O12  | N11  | 1.230(4)             | C9   | C8   | 1.467(4)             |
| N4   | C4   | 1.354(4)             | C4   | C3   | 1.470(4)             |
| N4   | C5   | 1.333(4)             | C3   | C2   | 1.401(4)             |
| N15  | N16  | 1.314(4)             | C8   | C7   | 1.413(4)             |
| N15  | C10  | 1.383(4)             | C7   | C6   | 1.394(5)             |
| N12  | C10  | 1.340(4)             | C2   | C1   | 1.387(4)             |

<sup>1</sup>2-X,-Y,1-Z; <sup>2</sup>1-X,1-Y,-Z

**Table 18. Bond Angles for 6.**

| Atom | Atom | Atom             | Angle/ $^{\circ}$ | Atom | Atom | Atom | Angle/ $^{\circ}$ |
|------|------|------------------|-------------------|------|------|------|-------------------|
| O8   | Zn2  | O9               | 175.38(10)        | C1   | N1   | N2   | 108.9(3)          |
| O8   | Zn2  | N10 <sup>1</sup> | 88.43(10)         | O14  | N16  | N15  | 117.0(3)          |
| O10  | Zn2  | O8               | 93.71(10)         | O13  | N16  | O14  | 120.6(3)          |
| O10  | Zn2  | O9               | 86.66(10)         | O13  | N16  | N15  | 122.4(3)          |

|                  |     |                  |            |     |     |                  |          |
|------------------|-----|------------------|------------|-----|-----|------------------|----------|
| O10              | Zn2 | N10 <sup>1</sup> | 164.35(10) | C5  | N6  | N5               | 110.5(3) |
| O9               | Zn2 | N10 <sup>1</sup> | 89.99(10)  | C10 | N14 | N13              | 111.1(3) |
| N12 <sup>1</sup> | Zn2 | O8               | 89.82(10)  | N8  | N7  | C5               | 117.3(3) |
| N12 <sup>1</sup> | Zn2 | O10              | 88.52(10)  | O11 | N11 | C7               | 117.7(3) |
| N12 <sup>1</sup> | Zn2 | O9               | 85.58(11)  | O12 | N11 | O11              | 122.7(3) |
| N12 <sup>1</sup> | Zn2 | N10 <sup>1</sup> | 75.97(10)  | O12 | N11 | C7               | 119.6(3) |
| N9               | Zn2 | O8               | 91.33(11)  | N1  | N2  | Zn1 <sup>2</sup> | 134.8(2) |
| N9               | Zn2 | O10              | 94.40(10)  | C3  | N2  | Zn1 <sup>2</sup> | 116.3(2) |
| N9               | Zn2 | O9               | 93.24(11)  | C3  | N2  | N1               | 108.9(3) |
| N9               | Zn2 | N12 <sup>1</sup> | 176.78(11) | O6  | N8  | O7               | 120.8(3) |
| N9               | Zn2 | N10 <sup>1</sup> | 101.06(10) | O6  | N8  | N7               | 122.0(3) |
| O1               | Zn1 | O3               | 176.50(11) | O7  | N8  | N7               | 117.2(3) |
| O2               | Zn1 | O1               | 93.47(11)  | O5  | N3  | O4               | 123.9(3) |
| O2               | Zn1 | O3               | 89.21(12)  | O5  | N3  | C2               | 119.6(3) |
| O2               | Zn1 | N4 <sup>2</sup>  | 87.19(10)  | O4  | N3  | C2               | 116.5(3) |
| O2               | Zn1 | N2 <sup>2</sup>  | 163.55(10) | C9  | N13 | N14              | 101.4(3) |
| N4 <sup>2</sup>  | Zn1 | O1               | 91.39(10)  | N12 | C10 | N15              | 119.1(3) |
| N4 <sup>2</sup>  | Zn1 | O3               | 86.48(11)  | N12 | C10 | N14              | 108.0(3) |
| N4 <sup>2</sup>  | Zn1 | N2 <sup>2</sup>  | 76.45(10)  | N14 | C10 | N15              | 132.8(3) |
| N1               | Zn1 | O1               | 88.95(11)  | N12 | C9  | C8               | 117.2(3) |
| N1               | Zn1 | O3               | 93.10(12)  | N13 | C9  | N12              | 114.9(3) |
| N1               | Zn1 | O2               | 94.46(11)  | N13 | C9  | C8               | 127.9(3) |
| N1               | Zn1 | N4 <sup>2</sup>  | 178.30(11) | N4  | C4  | C3               | 116.8(3) |
| N1               | Zn1 | N2 <sup>2</sup>  | 101.90(11) | N5  | C4  | N4               | 114.3(3) |
| N2 <sup>2</sup>  | Zn1 | O1               | 88.63(10)  | N5  | C4  | C3               | 128.9(3) |
| N2 <sup>2</sup>  | Zn1 | O3               | 88.16(11)  | N4  | C5  | N6               | 108.2(3) |
| C4               | N4  | Zn1 <sup>2</sup> | 115.2(2)   | N4  | C5  | N7               | 119.5(3) |
| C5               | N4  | Zn1 <sup>2</sup> | 139.7(2)   | N6  | C5  | N7               | 132.3(3) |
| C5               | N4  | C4               | 104.6(3)   | N2  | C3  | C4               | 115.0(3) |
| N16              | N15 | C10              | 116.4(3)   | N2  | C3  | C2               | 107.5(3) |
| C10              | N12 | Zn2 <sup>1</sup> | 139.0(2)   | C2  | C3  | C4               | 137.5(3) |
| C10              | N12 | C9               | 104.5(3)   | N10 | C8  | C9               | 114.8(3) |
| C9               | N12 | Zn2 <sup>1</sup> | 116.1(2)   | N10 | C8  | C7               | 107.9(3) |
| N9               | N10 | Zn2 <sup>1</sup> | 135.0(2)   | C7  | C8  | C9               | 137.4(3) |
| C8               | N10 | Zn2 <sup>1</sup> | 115.9(2)   | N11 | C7  | C8               | 130.1(3) |
| C8               | N10 | N9               | 109.1(3)   | C6  | C7  | N11              | 124.4(3) |
| C4               | N5  | N6               | 102.4(3)   | C6  | C7  | C8               | 105.5(3) |
| N10              | N9  | Zn2              | 123.9(2)   | C3  | C2  | N3               | 129.6(3) |
| C6               | N9  | Zn2              | 127.6(2)   | C1  | C2  | N3               | 124.1(3) |
| C6               | N9  | N10              | 108.5(3)   | C1  | C2  | C3               | 106.3(3) |

<sup>1</sup>2-X,-Y,1-Z; <sup>2</sup>1-X,1-Y,-Z

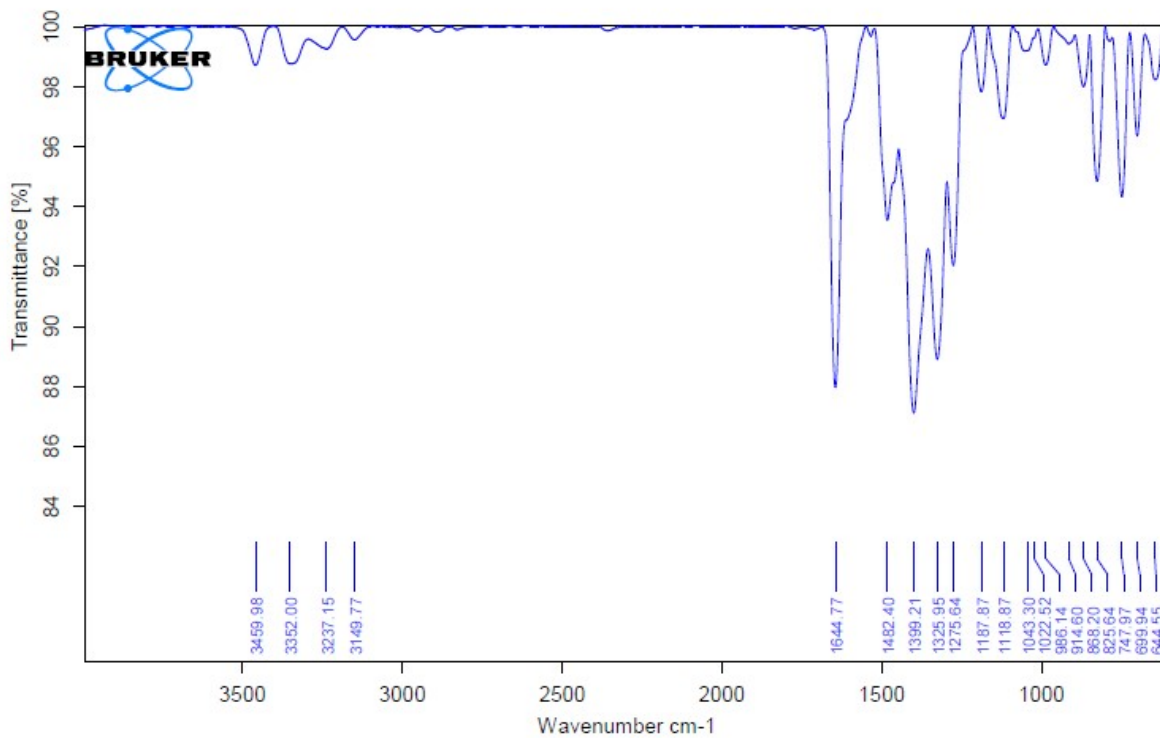

Figure S10. IR spectrum of compound 1.

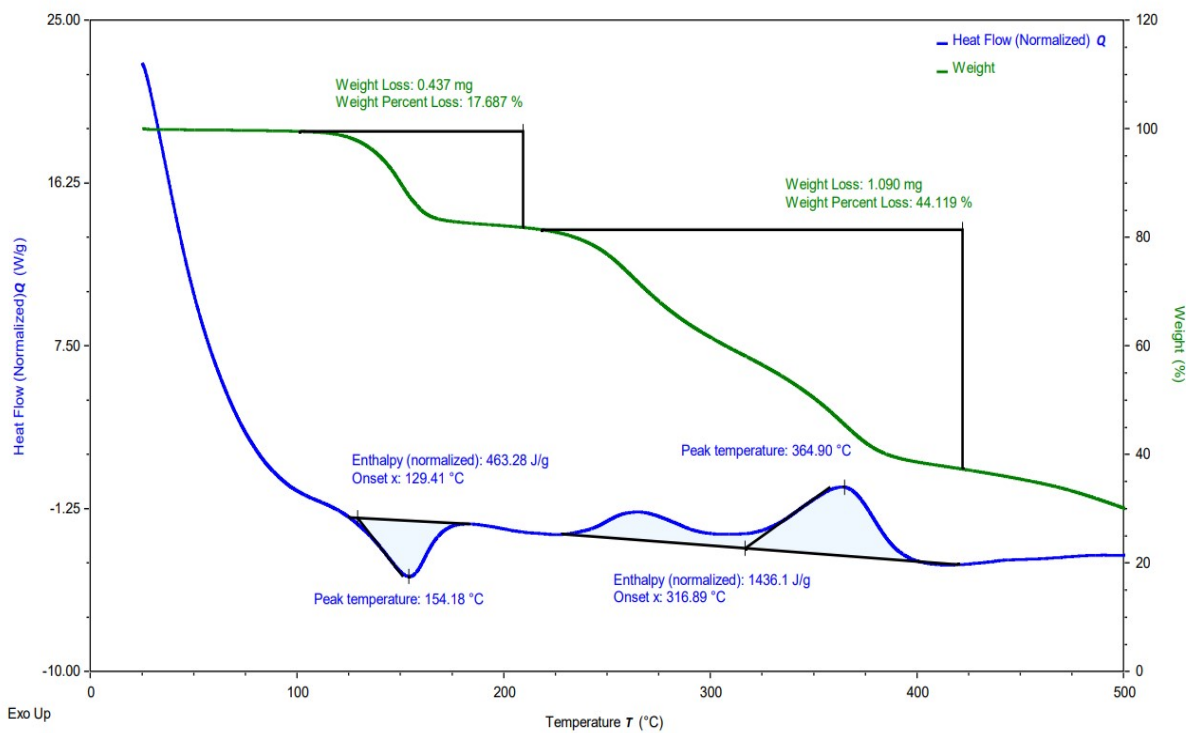

Figure S11. TGA-DSC spectra of compound 1.

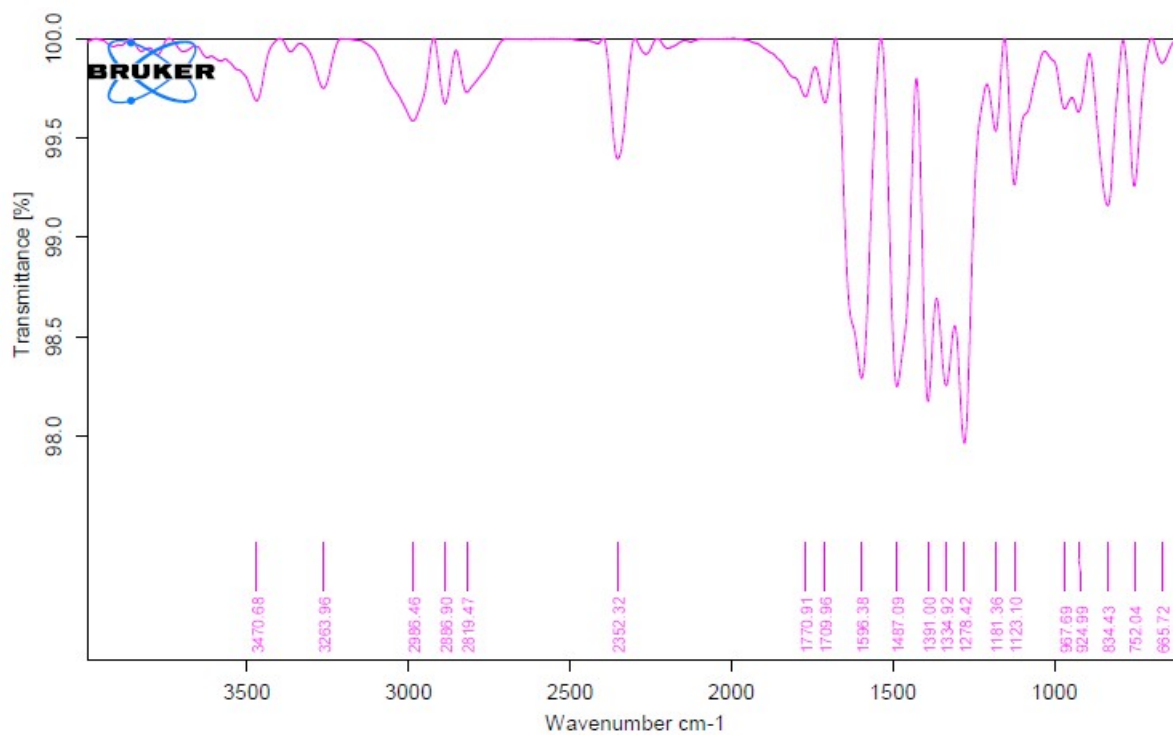

Figure S12. IR spectrum of compound 2.

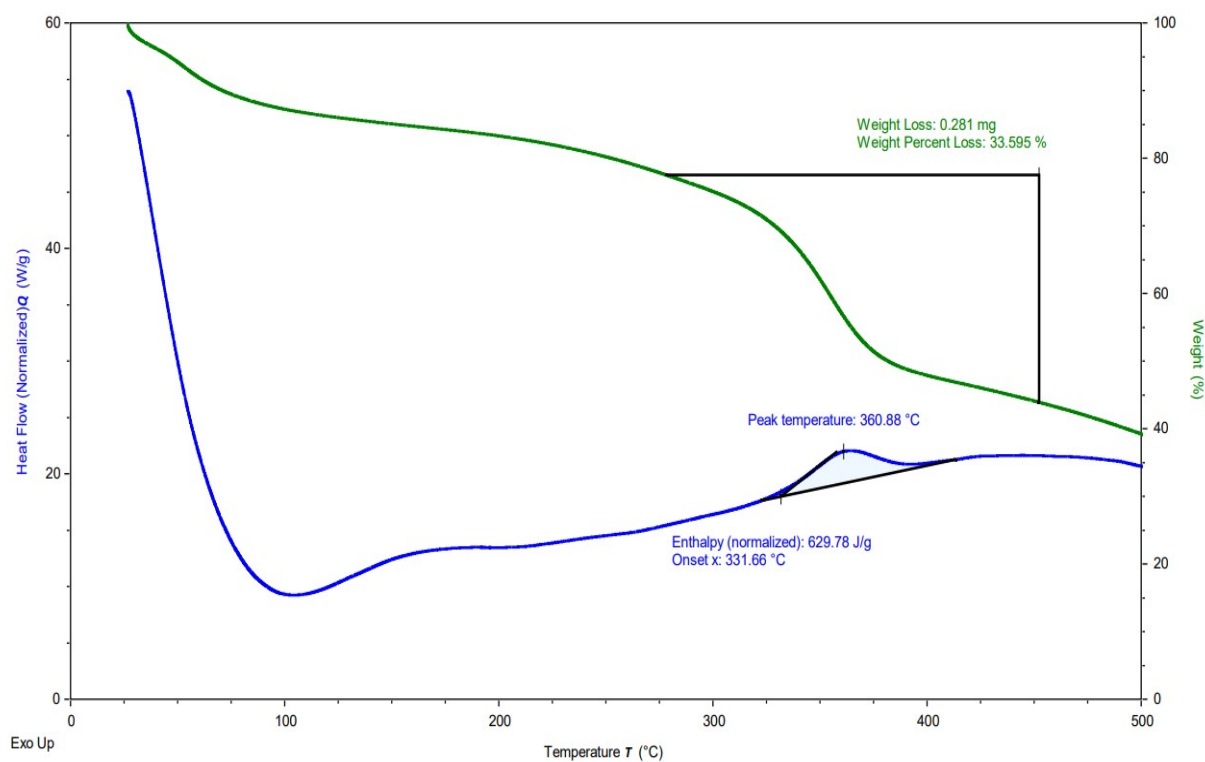

Figure S13. TGA-DSC spectra of compound 2.



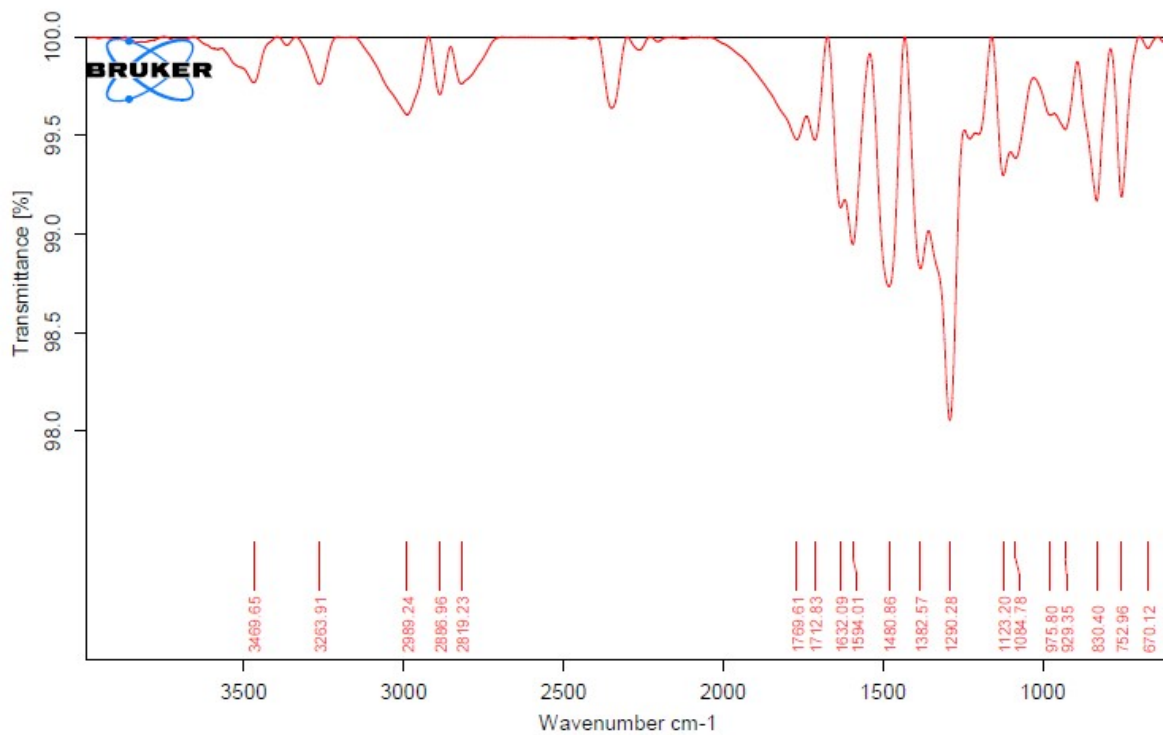

**Figure S14.** IR spectrum of compound **3**.

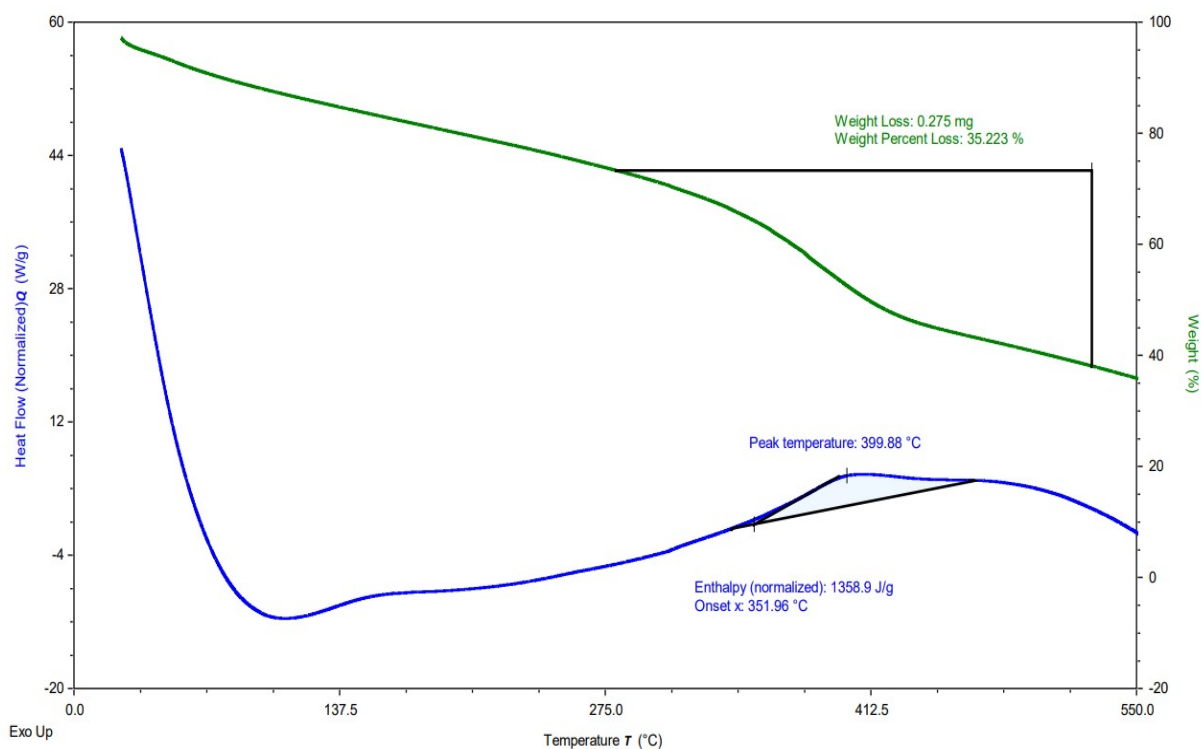

**Figure S15.** TGA-DSC spectra of compound **3**.

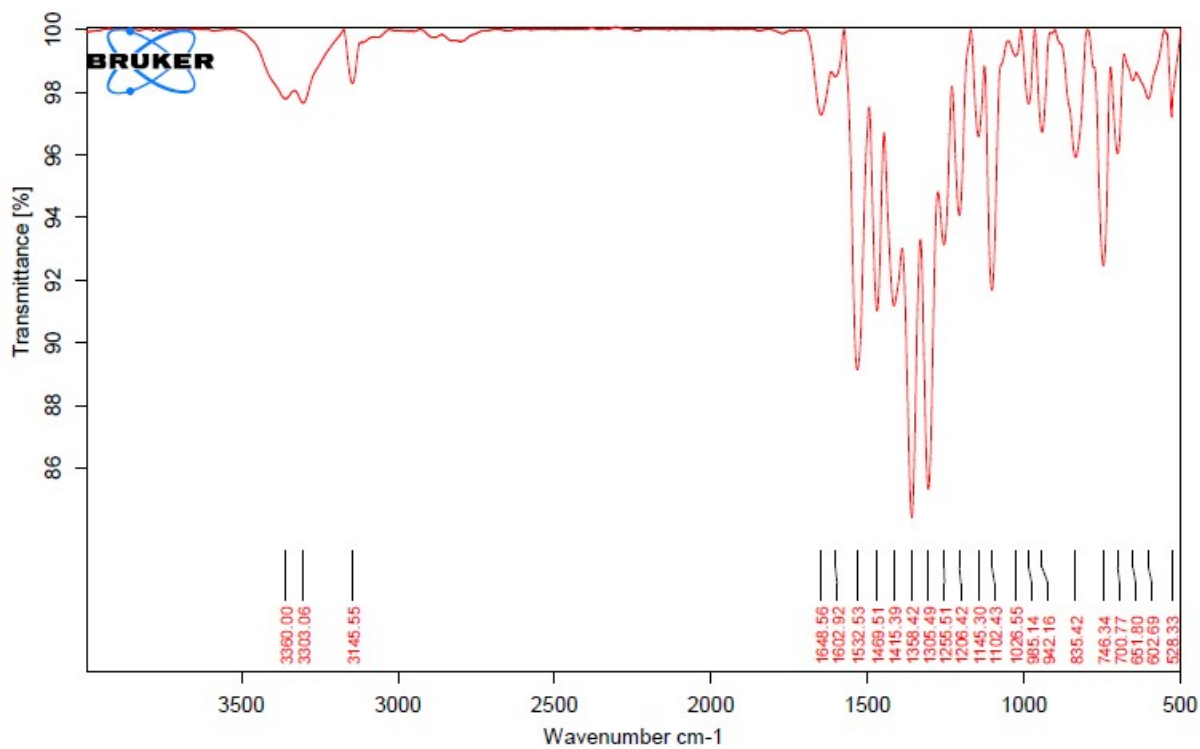

Figure S16. IR spectrum of compound 4.

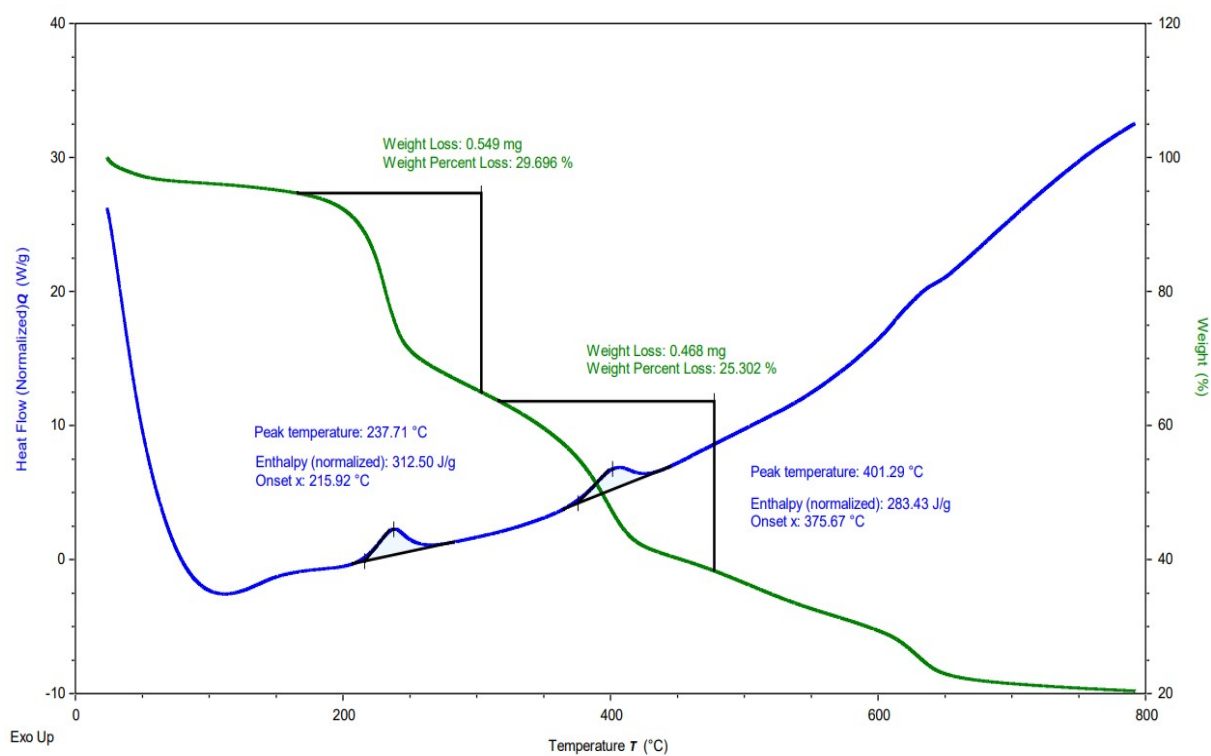

Figure S17. TGA-DSC spectra of compound 4.

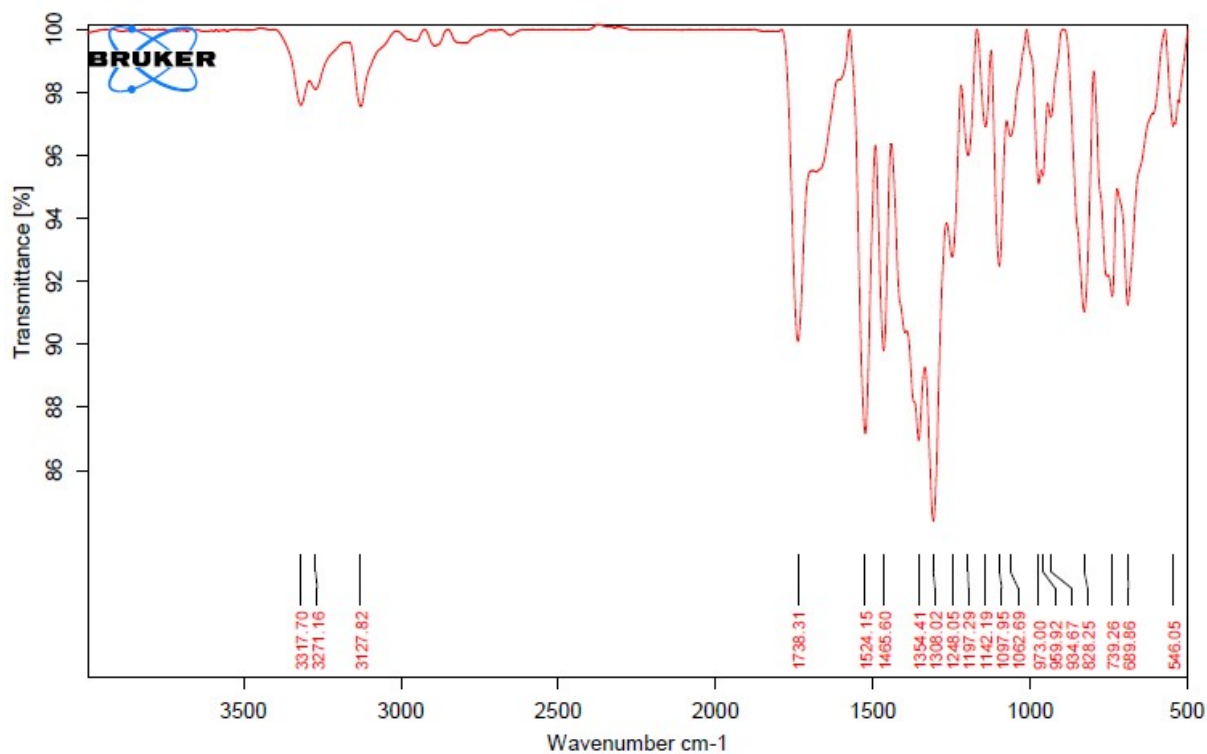

Figure S18. IR spectrum of compound 5.

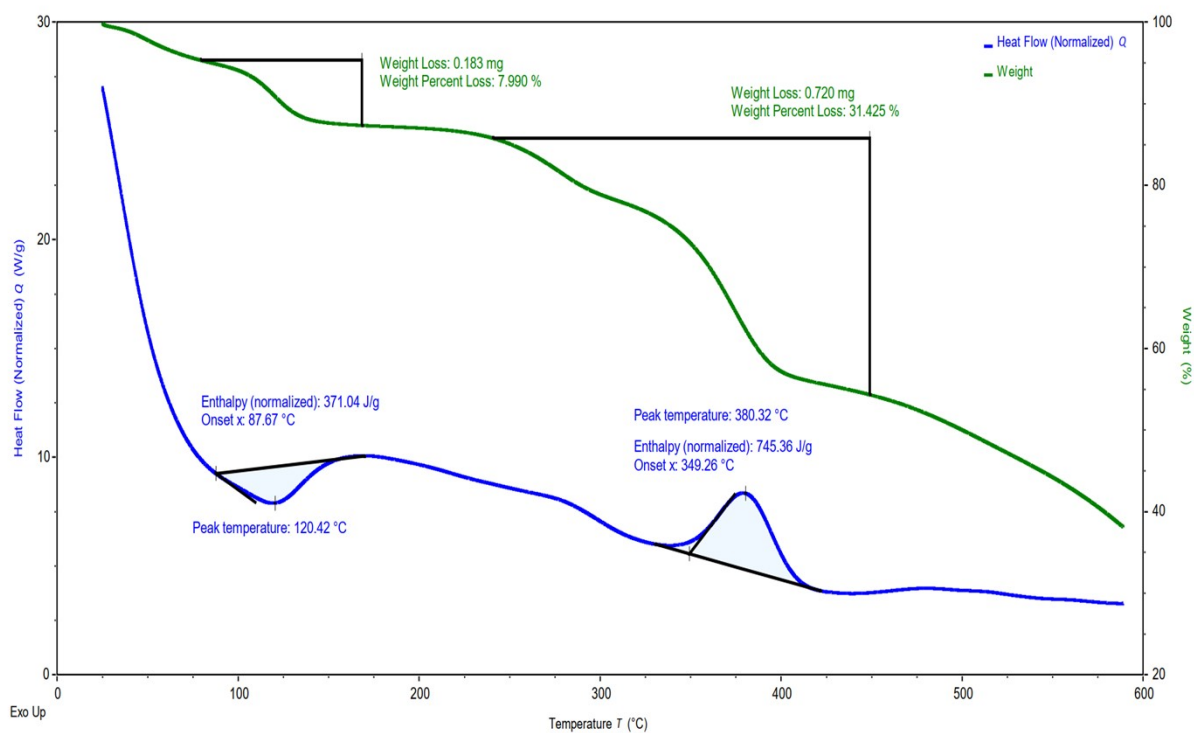

Figure S19. TGA-DSC spectra of compound 5.

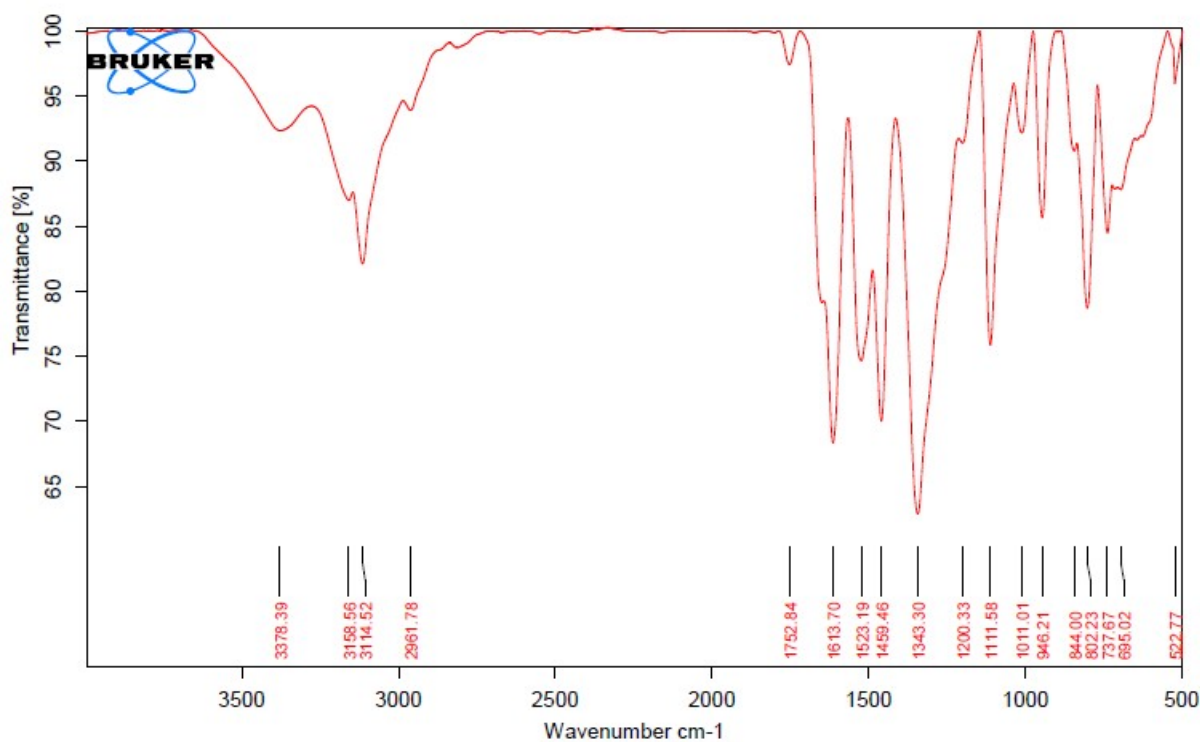

**Figure S20.** IR spectrum of compound **6**.

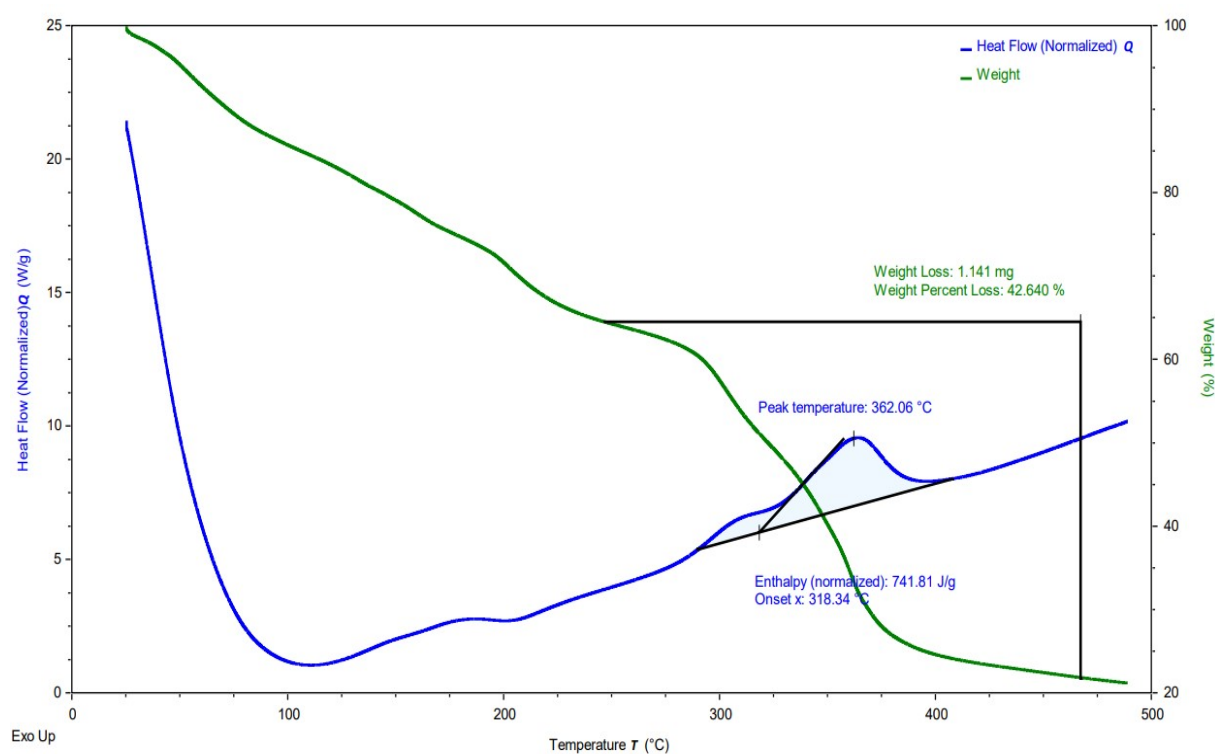

**Figure S21.** TGA-DSC spectra of compound **6**.

### Heat of combustion

The heat of combustion is a vital indicator for evaluating the energetic properties of the explosives. The constant-volume combustion energies of the compounds were determined by

a precise oxygen bomb calorimetry (Parr 6200 calorimeter). Approximately, 120 mg of compound and benzoic acid were mixed with a mass ratio of 1:3. The sample was sealed in a bomb, which subsequently burned in the pure oxygen atmosphere.

The  $\Delta_c U$  values for **1-6** are determined to be  $-7.54$ ,  $-6.33$ ,  $-6.10$ ,  $-9.98$ ,  $-9.71$  and  $-8.76$   $\text{kJ}\cdot\text{g}^{-1}$  respectively. The enthalpies of combustion ( $\Delta_c H^\circ$ ) of **1-6** are calculated to be  $-7.50$ ,  $-6.3$ ,  $-6.07$ ,  $-9.94$ ,  $-9.67$  and  $-8.73$   $\text{kJ}\cdot\text{g}^{-1}$ , respectively, on the basis of  $\Delta_c H = \Delta_c U + \Delta nRT$ , where  $\Delta n = n_g(\text{products}) - n_g(\text{reactants})$ ,  $R = 8.314 \text{ J}\cdot\text{mol}^{-1}\cdot\text{K}^{-1}$ ,  $T = 298.15 \text{ K}$  ( $n_g$  is the total molar amount of gases in the products or reactants). The combustion equations of the complexes are as follows-

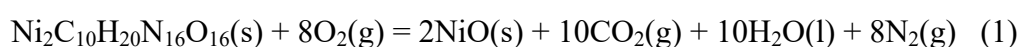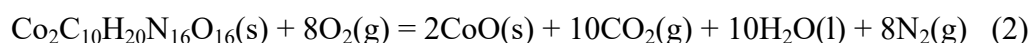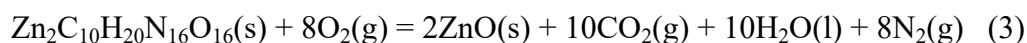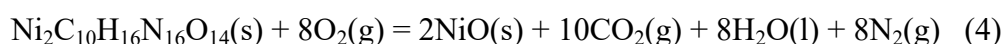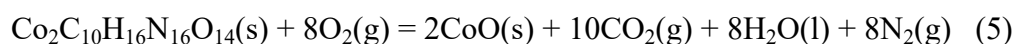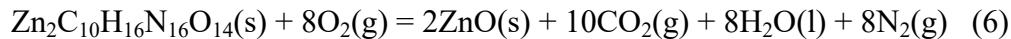

The  $\Delta_f H^\circ$  values of compounds **1, 2, 3, 4, 5** and **6** were calculated to be  $-2.35$ ,  $-3.17$ ,  $-3.90$ ,  $0.39$ ,  $0.14$  and  $-0.94$   $\text{kJ}\cdot\text{g}^{-1}$ , respectively, according to Hess's Law as shown in equations (7)-(12) with the known enthalpies of NiO (s,  $-240.0 \text{ kJ}\cdot\text{mol}^{-1}$ ), CoO (s,  $-237.74 \text{ kJ}\cdot\text{mol}^{-1}$ ), ZnO (s,  $-350.5 \text{ kJ}\cdot\text{mol}^{-1}$ ), H<sub>2</sub>O (l,  $-285.83 \text{ kJ}\cdot\text{mol}^{-1}$ ), and CO<sub>2</sub> (g,  $-393.51 \text{ kJ}\cdot\text{mol}^{-1}$ ).

$$\Delta_f H^\circ[\mathbf{1},\text{s}] = 2\Delta_f H^\circ[\text{NiO},\text{s}] + 10\Delta_f H^\circ[\text{CO}_2,\text{g}] + 10\Delta_f H^\circ[\text{H}_2\text{O},\text{l}] - \Delta_c H^\circ[\mathbf{1},\text{s}] \quad (7)$$

$$\Delta_f H^\circ[\mathbf{2},\text{s}] = 2\Delta_f H^\circ[\text{CoO},\text{s}] + 10\Delta_f H^\circ[\text{CO}_2,\text{g}] + 10\Delta_f H^\circ[\text{H}_2\text{O},\text{l}] - \Delta_c H^\circ[\mathbf{2},\text{s}] \quad (8)$$

$$\Delta_f H^\circ[\mathbf{3},\text{s}] = 2\Delta_f H^\circ[\text{ZnO},\text{s}] + 10\Delta_f H^\circ[\text{CO}_2,\text{g}] + 10\Delta_f H^\circ[\text{H}_2\text{O},\text{l}] - \Delta_c H^\circ[\mathbf{3},\text{s}] \quad (9)$$

$$\Delta_f H^\circ[\mathbf{4},\text{s}] = 2\Delta_f H^\circ[\text{NiO},\text{s}] + 10\Delta_f H^\circ[\text{CO}_2,\text{g}] + 8\Delta_f H^\circ[\text{H}_2\text{O},\text{l}] - \Delta_c H^\circ[\mathbf{4},\text{s}] \quad (10)$$

$$\Delta_f H^\circ[\mathbf{5},\text{s}] = 2\Delta_f H^\circ[\text{CoO},\text{s}] + 10\Delta_f H^\circ[\text{CO}_2,\text{g}] + 8\Delta_f H^\circ[\text{H}_2\text{O},\text{l}] - \Delta_c H^\circ[\mathbf{5},\text{s}] \quad (11)$$

$$\Delta_f H^\circ[\mathbf{6},\text{s}] = 2\Delta_f H^\circ[\text{ZnO},\text{s}] + 10\Delta_f H^\circ[\text{CO}_2,\text{g}] + 8\Delta_f H^\circ[\text{H}_2\text{O},\text{l}] - \Delta_c H^\circ[\mathbf{6},\text{s}] \quad (12)$$

## References

1. Dolomanov, O.V.; Bourhis, L.J.; Gildea, R. J.; Howard J.A.K.; Puschmann, H. OLEX2: a complete structure solution, refinement and analysis program. *J. Appl. Cryst.* **2009**, *42*, 339–341.
2. Bourhis, L. J.; Dolomanov, O.V.; Gildea, R.J.; Howard, J.A.K.; Puschmann, H. The anatomy of a comprehensive constrained, restrained refinement program for the modern computing environment - Olex2 dissected. *Acta Cryst.* **2015**, *A71*, 59–75.
3. Sheldrick, G.M. Crystal Structure Refinement with SHELXL. *Acta Cryst.* **2015**, *C71*, 3-8.
4. Bergerhoff, G.; Berndt, M.; Brandenburg, K. Evaluation of Crystallographic Data with the Program DIAMOND. *J. Res. Natl. Inst. Stand. Technol.* **1996**, *101*, 221–225.
